1 **Integrative analysis of scRNAs-seq and scATAC-seq revealed transit-amplifying thymic**  
2 **epithelial cells expressing autoimmune regulator**

3  
4 **Authors:**

5 Takahisa Miyao<sup>1,2,#</sup>, Maki Miyauchi<sup>1,#</sup>, S. Thomas Kelly<sup>3</sup>, Tommy W. Terooatea<sup>3</sup>, Tatsuya  
6 Ishikawa<sup>1</sup>, Eugene Oh<sup>1</sup>, Sotaro Hirai<sup>1</sup>, Kenta Horie<sup>1</sup>, Yuki Takakura<sup>1</sup>, Houko Ohki<sup>1</sup>, Mio  
7 Hayama<sup>1</sup>, Yuya Maruyama<sup>1</sup>, Takao Seki<sup>1</sup>, Haruka Yabukami<sup>3</sup>, Masaki Yoshida<sup>4</sup>, Azusa Inoue<sup>5</sup>,  
8 Asako Sakaue-Sawano<sup>6</sup>, Atsushi Miyawaki<sup>6</sup>, Masafumi Muratani<sup>7</sup>, Aki Minoda<sup>3</sup>, Nobuko  
9 Akiyama<sup>1,\*</sup>, and Taishin Akiyama<sup>1,2,\*</sup>

10

11 **Affiliations:**

12 <sup>1</sup>Laboratory for Immune Homeostasis, RIKEN Center for Integrative Medical Sciences,  
13 Yokohama 230-0045, Japan

14 <sup>2</sup>Immunobiology, Graduate School of Medical Life Science, Yokohama City University,  
15 Yokohama 230-0045, Japan

16 <sup>3</sup>Laboratory for Cellular Epigenomics, RIKEN Center for Integrative Medical Sciences,  
17 Yokohama 230-0045, Japan

18 <sup>4</sup>YCI Laboratory for Immunological Transcriptomics, RIKEN Center for Integrative Medical  
19 Sciences, Kanagawa 230-0045, Japan

20 <sup>5</sup>YCI Laboratory for Metabolic Epigenetics, RIKEN Center for Integrative Medical Sciences,  
21 Kanagawa 230-0045, Japan

22 <sup>6</sup>Laboratory for Cell Function Dynamics, RIKEN Center for Brain Science,  
23 Saitama 351-0198 JAPAN

24 <sup>7</sup>Transborder Medical Research Center, and Department of Genome Biology, Faculty of  
25 Medicine, University of Tsukuba, Ibaraki 305-8575, Japan

26

27 #These authors equally contribute to this works

28

29 **Contact Information:** Taishin Akiyama, Ph.D. and Nobuko Akiyama, Ph.D.

30 Postal address: 1-7-22 Suehiro-cho, Tsurumi-ku, Yokohama 230-0045, Japan

31 Email: [taishin.akiyama@riken.jp](mailto:taishin.akiyama@riken.jp) or [nobuko.akiyama@riken.jp](mailto:nobuko.akiyama@riken.jp)

32

33

34 **Summary**

35 Medullary thymic epithelial cells (mTECs) are critical for self-tolerance induction in T cells via  
36 promiscuous expression of tissue-specific antigens (TSAs), which are controlled by  
37 transcriptional regulator AIRE. Whereas AIRE-expressing (Aire<sup>+</sup>) mTECs undergo constant  
38 turnover in the adult thymus, mechanisms underlying differentiation of postnatal mTECs remain  
39 to be discovered. Integrative analysis of single-cell assays for transposase accessible chromatin  
40 (scATAC-seq) and single-cell RNA sequencing (scRNA-seq) suggested the presence of  
41 proliferating mTECs with a specific chromatin structure, which express high levels of Aire and  
42 co-stimulatory molecules CD80 (Aire<sup>+</sup>CD80<sup>hi</sup>). Proliferating Aire<sup>+</sup>CD80<sup>hi</sup> mTECs detected by  
43 using Fucci technology express a minimal level of Aire-dependent TSAs and are converted into  
44 quiescent Aire<sup>+</sup>CD80<sup>hi</sup> mTECs expressing high levels of TSAs after a transit amplification.  
45 These data provide evidence for the existence of transit amplifying Aire<sup>+</sup>mTEC precursors  
46 during Aire<sup>+</sup>mTEC differentiation process of the postnatal thymus.

47

48 **Keywords**

49 Medullary thymic epithelial cells, AIRE, Transit-amplifying cells, Self-tolerance,  
50 Differentiation, Single cell RNA sequencing, Single cell ATAC sequencing

51

52

53

54

## 55 Introduction

56 Medullary thymic epithelial cells (mTECs) are essential for induction of T cell self-tolerance in  
57 the thymus<sup>1,2</sup>. mTECs ectopically express thousands of tissue-specific antigens (TSAs), and  
58 this expression is regulated by transcription factors, AIRE and FEZF2<sup>3,4</sup>. TSAs are directly or  
59 indirectly presented to developing T cells, and T cells that recognize TSAs with high affinity  
60 undergo apoptosis or are converted into regulatory T cells, thereby suppressing the onset of  
61 autoimmune diseases<sup>1,2</sup>.

62  
63 Several studies have suggested processes and underlying mechanisms of mTEC differentiation  
64 during thymic organogenesis<sup>1, 2, 5, 6, 7, 8, 9, 10, 11</sup>. In addition, some previous studies suggest that  
65 mTEC turnover is homeostatic in the adult thymus, with a duration of approximately 2 weeks<sup>12,</sup>  
66 <sup>13, 14</sup>. Notably however, cellular mechanisms underlying maintenance of adult mTECs remain  
67 unclear. mTEC subpopulations are largely classified based on their expression of cell surface  
68 markers (mainly CD80 and MHC class II) and Aire in the adult thymus<sup>1</sup>. CD80<sup>lo</sup> and  
69 Aire-negative (Aire<sup>-</sup>) mTECs (mTEC<sup>lo</sup>) are thought to be immature, and they differentiate into  
70 CD80<sup>hi</sup> Aire-expressing (Aire<sup>+</sup>) mTECs that are reportedly post-mitotic<sup>13</sup>. Aire<sup>+</sup> mTECs are  
71 further converted into Aire-negative mTECs (post-Aire mTECs)<sup>15, 16, 17, 18, 19</sup>. Moreover, a  
72 previous study suggested that mTECs might be differentiated from stage-specific embryonic  
73 antigen-1<sup>+</sup> (SSEA-1) claudine3/4<sup>+</sup> mTEC stem cells<sup>20</sup>. These views are primarily based on fate  
74 mapping studies involving transfer and re-aggregation of sorted cell populations with fetal  
75 thymus<sup>5, 13, 20</sup> and on experiments employing genetic marking<sup>15, 17</sup>.

76  
77 Single-cell RNA sequencing (scRNA-seq) technology has yielded new insights into cell  
78 diversity and differentiation in various tissues. In TEC biology, previous scRNA-seq studies  
79 revealed a stochastic nature of TSA expression in mTECs<sup>21, 22</sup> and high heterogeneity of TECs  
80 in mice<sup>23, 24, 25, 26</sup>. Bornstein et al. showed that mTECs in the postnatal thymus are separated  
81 into four subsets, mTEC I to IV<sup>23</sup>. In addition to the classical mTEC<sup>lo</sup> (mTEC I), Aire<sup>+</sup> mTEC  
82 (mTEC II), and post-Aire mTEC (mTEC III) types, a tuft-like mTEC subset (mTEC IV) was  
83 identified<sup>23, 24</sup>. Subsequent scRNA-seq studies suggested further heterogeneity of TECs, such as  
84 cilium TECs<sup>25</sup>, GP2<sup>+</sup> TECs<sup>25</sup>, intertypical TECs<sup>26</sup>, neural TECs<sup>26</sup>, and structural TECs<sup>26</sup>,  
85 according to specific gene expression profiles. However, it has not yet been clarified whether  
86 this heterogeneity identified from gene expression profiles is correlated with differences in  
87 chromatin structure.

88

89 In general, transit-amplifying cells (TACs) are a proliferating cell population linking stem cells  
90 and differentiated cells<sup>27</sup>. TACs are short-lived and undergo differentiation after a few cell  
91 divisions. To date, the presence of TACs has been confirmed in some tissues such as intestines<sup>28</sup>,  
92 hair follicles<sup>29</sup>, and neurons<sup>30</sup>. Previous analyses of scRNA-seq data of murine adult TECs  
93 revealed a cell cluster expressing an abundance of cell-cycle regulated genes, which implies the  
94 presence of TACs for TECs (TA-TECs)<sup>25,31</sup>. Computational trajectory analysis of scRNA-seq  
95 data suggested that this population might give rise to Aire-expressing mTECs<sup>25,26</sup>. Intriguingly,  
96 another trajectory study predicted that this cell cluster might differentiate into Aire-expressing  
97 mTECs and an mTEC population expressing CCL21a<sup>31</sup>. However, because the TA-TEC  
98 candidate has not been isolated and specific marker genes of TA-TECs have not been reported,  
99 exact properties of TA-TECs, in addition to their cellular fates, remain to be clarified.

100

101 In this study, droplet-based scRNA-seq and scATAC-seq of murine TECs were performed to  
102 characterize TEC heterogeneity and differentiation dynamics. Integrative analysis of these data  
103 showed that Aire<sup>+</sup> mTECs are separated into at least 2 clusters with different gene expression  
104 profiles and chromatin accessibilities. One of these Aire<sup>+</sup> mTEC clusters exhibited high  
105 expression of cell cycle-related genes, which accords with a previously proposed TAC  
106 population of mTECs<sup>25,31</sup>. By using the Fucci technology<sup>32</sup>, proliferating mTECs expressing  
107 Aire and maturation marker CD80 were isolated as TA-TEC candidates. This proliferating Aire<sup>+</sup>  
108 CD80<sup>hi</sup> mTEC subpopulation showed minimal expression of TSAs regulated by AIRE, in  
109 contrast to quiescent Aire<sup>+</sup> CD80<sup>hi</sup> mTECs. Moreover, *in vivo* BrdU pulse-labeling, and *in vitro*  
110 reaggregated thymic organ culture suggested that proliferating Aire<sup>+</sup> CD80<sup>hi</sup> mTECs are  
111 short-lived and that they differentiate into quiescent Aire<sup>+</sup> CD80<sup>hi</sup> mTECs, post-Aire mTECs,  
112 and tuft-like mTECs. Consequently, these data strongly suggest that proliferating Aire<sup>+</sup> CD80<sup>hi</sup>  
113 mTECs are TACs for mTECs expressing TSAs.

114

## 115 **Results**

### 116 *Droplet-based scATAC-seq reveals heterogeneity of TEC chromatin structure*

117 Given that chromatin structures can be changed during cell differentiation, scATAC-seq analysis  
118 of TECs may offer some insights into TEC heterogeneity and differentiation dynamics.

119 Droplet-based scATAC-seq analysis was carried out with EpCAM<sup>+</sup> CD45<sup>-</sup> cells that were sorted  
120 and pooled from thymi of 2 mice, 4 weeks of age. Unsupervised graph-based clustering and



121 dimensional reduction via uniform manifold approximation and production (UMAP) using the  
122 Signac R package (<https://www.biorxiv.org/content/10.1101/2020.11.09.373613v1>) revealed 11  
123 cell clusters from 8,413 cells (Figure 1A). We first analyzed chromatin accessibility of  
124 previously known TEC marker genes. Clusters 0, 3, 4, 5, 8 and 9 contained relatively higher  
125 numbers of cells having the open chromatin structure of the *Cd80* gene, a maturation marker of  
126 TECs (Figure 1B and C). Among these clusters, the *cis*-regulatory element of the *Aire* gene<sup>33</sup>  
127 (about 3 kbp upstream of the transcriptional start site) is opened in clusters 0 and 3 (Figure 1D),  
128 suggesting that these clusters (cluster 0 and 3) may be concordant with Aire-expressing mTECs  
129 (*Aire*<sup>+</sup> mTECs, also referred to as mTEC II<sup>23</sup>). In contrast, the *cis* element of *Aire* genes is  
130 closed in clusters 4, 5, 8, and 9 (Figure 1D), suggesting that these clusters may correspond to  
131 post-Aire mTECs and other Aire-negative mature mTECs<sup>23</sup>. Because the *Lrmp* gene region is  
132 accessible in cluster 5 (Figure 1B and Figure 1—figure supplement 1A), this cluster may be  
133 equivalent to tuft-like mTECs (mTEC IV)<sup>23,24</sup>. CD80 and *Aire* gene regions in clusters 1, 2, and  
134 6 are relatively closed, whereas the mTEC marker *Tnfrsf11a* is relatively accessible (Figure 1B  
135 and C, and Figure 1—figure supplement 1A). Therefore, these clusters should be equivalent to  
136 mTECs expressing low levels of CD80 and *Aire* (mTEC<sup>lo</sup>). Cluster 7 should be cTECs, because  
137 cTEC marker *Psmb11* gene region is opened (Figure 1B and Figure 1—figure supplement 1A).  
138 Finally, cluster 10 was deemed thymocyte contamination because the *Rag1* gene was opened  
139 (Figure 1—figure supplement 1A).

140  
141 We next sought to correlate the scATAC data with TEC scRNA-seq data. Droplet-based  
142 scRNA-seq analysis of 11,475 EpCAM<sup>+</sup> CD45<sup>-</sup> cells from age- and gender-matched mice  
143 (4-week-old female mice) revealed 18 cell clusters (Figure 2A), and expression of TEC marker  
144 genes in these clusters was analyzed (Figure 2B and Figure 2—figure supplement 1). Integrative  
145 analysis with reported datasets suggests quality comparable to that of our dataset (Figure  
146 2—figure supplement 2). Clusters R0, R1, R3, and R9 showed high expression of *Aire*,  
147 suggesting that these clusters are equivalent to *Aire*<sup>+</sup> mTECs (also referred to as mTECs II).  
148 Clusters R2, R4 and R5 include cells showing relatively higher levels of *Iga6* and *Ccl21a*  
149 expression and a very low level of *Aire* expression (Figure 2A and b), corresponding to mTEC I  
150<sup>23</sup>, CCL21-expressing mTECs<sup>34</sup>, and possibly intertypical TECs<sup>26</sup>. Cluster R6 expresses *Lrmp*  
151 (Figure 2B), and should contain tuft-like mTECs (mTEC IV)<sup>23</sup>. Clusters R7 and R10 were  
152 marked with *Krt10* and *Pigr* genes, respectively (Figure 2B). Accordingly, these clusters should  
153 be categorized as post-Aire mTECs (also referred as to mTECs III<sup>23</sup>). Cluster R13 showed high

154 expression of chemokines, *Ccl6* and *Gp2* (Figure 2B and Figure 2—figure supplement 1A),  
155 which should be concordant with Gp2<sup>+</sup> TECs, as reported recently<sup>25</sup>. Clusters R8 and R11  
156 exhibited high expression of typical cTEC marker genes, *Psmb11* and *Dll4* (Figure 2B and  
157 Figure 2—figure supplement 1A), and should be equivalent to cTECs. Given that thymocyte  
158 genes are highly expressed, cluster R11 was most likely thymic nurse cells enclosing  
159 thymocytes<sup>35</sup>. Cluster R12 showed relatively high expression of *Pdpr* (Figure 2—figure  
160 supplement 1A), which may comprise junctional TECs<sup>36</sup>. Cluster R14 was considered  
161 thymocyte contamination because thymocyte markers, but not TEC markers, were detected.  
162 Cluster R15 apparently corresponds to structural TECs, reported recently, because of their  
163 expression of *Car8* and *Cd177*<sup>26</sup> (Figure 2—figure supplement 1A). Cells in cluster R16 highly  
164 express *Tppp3* and *Fam183b* (Figure 2—figure supplement 1A). Since these genes are  
165 expressed in ciliated cells<sup>37,38</sup>, this cluster may be equivalent to ciliated columnar TECs  
166 associated with thymic cystic structure<sup>25,39,40</sup>. We failed to assign cluster R17, which may be  
167 contaminated with endothelial cells or macrophages, because they express *Ly6c1* and *Aqp1*, but  
168 low levels of *Epcam* (Figure 2—figure supplement 1A). Overall, our data and assignments are  
169 reasonably correlated with previous scRNA-seq data analyses<sup>23,25,26,31</sup>.

170  
171 We then bioinformatically integrated the scRNA-seq data with scATAC-seq data. Gene  
172 expression, predicted from accessible chromatin regions of scATAC-seq data, was correlated  
173 with scRNA-seq data using the Signac R package (Figure 3A and Figure 3—figure supplement  
174 1). As described, clusters 0 and 3 in scATAC-seq analysis contain cells with the accessible  
175 *cis*-regulatory element of the *Aire* gene (Figure 1D). Consistently, cluster 0 in scATAC-seq were  
176 mostly transferred to cluster R0 (40.5 %) and R3 (26.3%) in scRNA-seq analysis (Figure 3B  
177 and C, and Supplementary Table 1), which were assigned as Aire<sup>+</sup> mTECs (Figure 2). Cells  
178 transferred to R0 and R3 appear to be separately embedded in cluster 0 in the UMAP dimension,  
179 implying that these two Aire<sup>+</sup> mTEC subsets have slightly different chromatin structures.  
180 Cluster 3 was mostly transferred to cluster R1 (88.2%) (Figure 3B and C), also designated as  
181 Aire<sup>+</sup> mTECs. Interestingly, cells transferred to cluster R9 are embedded around the junction  
182 between cluster 0 and 3 (Figure 3B), suggesting that cluster R9 may be a transitional stage  
183 between R1 and R0. Clusters 1, 2, and 6 are closely embedded in the UMAP dimension and  
184 principally assigned to clusters R2, R4, and R5 (Figure 3B and C), suggesting that these clusters  
185 are concordant with mTEC I or intertypical TECs assigned in the scRNA-seq data. Cluster 4  
186 mainly contains cells transferred to cluster R7 (55.0%) and R10 (27.2%) (Figure 3B), which

187 were assigned as post-Aire mTECs (mTEC III). Cells assigned in R7 and R10 were embedded  
188 in distinct regions of cluster 4, implying that post Aire<sup>+</sup> mTECs consist of two cell types with  
189 slightly different gene expression profiles and chromatin structures. As expected, cluster 5 with  
190 an open *Lrmp* gene was transferred to cluster R6, a tuft-like mTEC subset (mTEC IV). Cluster 9  
191 was assigned as cluster R13, which was Gp2<sup>+</sup> TECs (Figure 3B and C). Cluster 7 was  
192 transferred to cluster R8 and R12, assigned as cTECs and jTECs, respectively. Cluster 8  
193 contains clusters R15 (64.7%) and R16 (34.2%), which express markers of structural TECs and  
194 cilia TECs, respectively (Figure 3C and Figure 3—figure supplement 1). Finally, cluster 10 was  
195 transferred to clusters R11 and R14, which are assigned as T cells and Nurse TECs (Figure 3C  
196 and Figure 3—figure supplement 1). Although a few cells were transferred to R17 in  
197 scRNA-seq, these cells did not form cluster in this analysis. Thus, TEC heterogeneity predicted  
198 from scRNA-seq may be ascribed to differences in chromatin structure.

199

#### 200 *Aire-positive mTECs are divided into two subsets having distinct chromatin structures*

201 Previous scRNA-seq studies proposed the existence of a TEC population showing high  
202 expression of cell-cycle-regulated genes<sup>25,26,31</sup>. In our scRNA-seq data, cluster R1 (mTEC IIb)  
203 appears equivalent to such a TEC subset, expressing cell-cycle-related genes (Figure 2—figure  
204 supplement 1). Sub-clustering of cluster R1 showed its separation into 5 sub-clusters (R1A to  
205 R1E in Figure 2—figure supplement 3A and B). Clusters R1A, R1B, R1C and R1D showed  
206 expression of *Aire*. In contrast, *Ccl21a*, but not *Aire*, is highly expressed in cluster R1E (Figure  
207 2—figure supplement 3C and D). This is largely consistent with a previous study. Thus, TECs  
208 expressing cell-cycle-related genes defined in scRNA-seq analysis may be divided into  
209 Aire-positive and Aire-negative *Ccl21a*<sup>high</sup> subsets<sup>31</sup>.

210

211 Integrative analysis of scRNA-seq and scATAC-seq suggested that cells in cluster 3 in  
212 scATAC-seq were transferred to cluster R1. Notably, although both clusters 0 and 3 have the  
213 accessible enhancer element of the *Aire* gene (Figure 1), 327 genomic regions were significantly  
214 opened, and 85 regions were closed in cluster 3, in contrast to cluster 0 (Supplementary Table 2  
215 and Figure 2—figure supplement 1B). Thus, it is likely that the Aire<sup>+</sup> mTECs subset expressing  
216 cell cycle-related genes have a distinct chromatin structure relative to other TEC subsets.

217

218 Notably, some cells of clusters 1 (7%) and 0 were assigned as cluster R1 (Figure 3). This may  
219 be consistent with the heterogeneity of R1, suggested from the subcluster analysis (Figure

220 2—figure supplement 3). Consistently, scATAC-seq analysis showed that chromatin  
221 accessibility of a marker gene for cluster R1E (*Mgp*, Figure 2—figure supplement 3B) was low  
222 in cluster 3 and relatively higher in cluster 1 (Figure 2—figure supplement 3E). Thus, this  
223 analysis suggests that R1 includes a *Ccl21a*<sup>high</sup> TEC subset having a chromatin structure  
224 different from the *Aire*<sup>high</sup> TEC subsets in cluster R1. Thus, it is possible that TECs expressing  
225 cell-cycle-related genes, proposed by scRNA-seq analysis, contain at least two proliferating  
226 TECs subsets having different chromatin accessibilities and gene expression profiles.

227  
228 RNA velocity, which recapitulates differentiation dynamics by comparing unspliced and spliced  
229 RNA in scRNA-seq data<sup>41</sup>, predicted that cluster R1 may differentiate into other *Aire*<sup>+</sup> mTECs  
230 (clusters R0, R3 and R9) (Figure 3—figure supplement 2A), which is consistent with analyses  
231 of others<sup>25</sup>. Moreover, trajectory analysis of scATAC-seq data using the Monocle3 package also  
232 suggested a possible transition between cluster 3 and cluster 0 (Figure 3—figure supplement  
233 2B). Thus, these trajectory analyses of scRNA-seq and scATAC-seq suggest that the *Aire*<sup>+</sup>  
234 mTEC subset expressing cell-cycle-related genes may be precursors of other *Aire*<sup>+</sup> mTECs.  
235 Thus, integrative analysis of scATAC-seq and scRNA-seq data imply that cluster 3 (cluster R1)  
236 may be equivalent to transiently amplifying cells (TA cells) with a distinct chromatin structure.

237  
238 *A proliferative cell subset is present in Aire<sup>+</sup> mTECs*

239 TA cells were defined as a proliferative, short-lived cell subset generated from progenitor or  
240 stem cells and differentiating into mature quiescent cells<sup>27,42</sup>. To search for evidence supporting  
241 the presence of TA cells of mTECs (TA-TECs), we first sought to isolate the proliferating *Aire*<sup>+</sup>  
242 CD80<sup>hi</sup> mTEC subset as candidate TA-TECs. Fucci2a mice, in which cell cycle progression can  
243 be monitored with mCherry (G1 and G0 phases) and Venus (G2, M, and S phases) fluorescence,  
244 were used to isolate such proliferating cells (Figure 4A)<sup>32,43,44,45</sup>, and were crossed with  
245 *Aire*-GFP-reporter mice to facilitate detection of *Aire* expression<sup>46</sup>. Flow cytometry analysis  
246 indicated that Venus<sup>+</sup> cells are present in mTECs expressing high levels of CD80 (mTEC<sup>hi</sup>).  
247 Moreover, these Venus<sup>+</sup> mTECs<sup>hi</sup> expressed *Aire*-GFP (Figure 4B). Thus, these data revealed the  
248 presence of dividing cells in the *Aire*<sup>+</sup> CD80<sup>hi</sup> mTEC fraction. The fluorescence intensity of  
249 *Aire*-GFP in Venus<sup>+</sup> CD80<sup>hi</sup> mTECs showed a broad peak and was slightly lower than that of  
250 Venus<sup>-</sup> mTEC<sup>hi</sup> cells, which may be due to the relatively lower expression of *Aire* in Venus<sup>+</sup>  
251 CD80<sup>hi</sup> mTECs. However, the compensation between GFP and Venus proteins, which have very  
252 close fluorescence spectra, hampered an exact comparison of *Aire* expression levels between

253 Venus<sup>+</sup> mTEC<sup>hi</sup> cells and Venus<sup>-</sup> mTEC<sup>hi</sup> cells. We next confirmed Aire protein expression in  
254 proliferating mature mTECs. Immunostaining with an anti-Aire-antibody revealed the presence  
255 of Aire protein localized in the nucleus of sorted Venus<sup>+</sup> CD80<sup>hi</sup> mTECs (Figure 4C). Moreover,  
256 immunostaining of the thymic section from *Foxn1*-specific Fucci2a mice revealed that Venus<sup>+</sup>  
257 cells are localized in the medulla, and some of the Aire<sup>+</sup> mTECs were Venus<sup>+</sup> (Figure 4D and  
258 Figure 4—figure supplement 1). Taken together, these data confirm the presence of proliferating  
259 Aire<sup>+</sup> CD80<sup>hi</sup> mTECs in the thymic medulla.

260

#### 261 *Proliferating Aire<sup>+</sup> mTECs express low levels of Aire-dependent TSAs*

262 We next addressed whether the proliferating Aire<sup>+</sup>CD80<sup>hi</sup> mTECs subset has molecular  
263 signature distinct from that of quiescent Aire<sup>+</sup>CD80<sup>hi</sup> mTECs. RNA-seq analysis of sorted cells  
264 from Fucci mice suggested that Venus<sup>+</sup> CD80<sup>hi</sup> mTECs and Venus<sup>-</sup> CD80<sup>hi</sup> mTECs subsets have  
265 considerably different gene expression profiles (Figure 4E). As expected, gene ontology  
266 analysis confirmed enrichment of cell cycle-related genes in Venus<sup>+</sup> CD80<sup>hi</sup> mTECs compared  
267 with Venus<sup>-</sup> CD80<sup>hi</sup> mTECs (Supplementary Table 3). Notably, although expression levels of  
268 Aire were comparable (Figure 4F), the Venus<sup>+</sup> CD80<sup>hi</sup> mTEC subset expressed lower levels of  
269 Aire-dependent TSAs than the Venus<sup>-</sup> CD80<sup>hi</sup> mTECs subset (Figure 4F and G). However,  
270 expression of Aire-independent TSAs was relatively comparable in the two subsets (Figure 4G).  
271 These data suggested that proliferating Aire<sup>+</sup>CD80<sup>hi</sup> mTECs are phenotypically immature,  
272 compared to quiescent Aire<sup>+</sup>CD80<sup>hi</sup> mTECs.

273

#### 274 *Proliferating Aire<sup>+</sup> mTECs are precursors of mature mTECs*

275 Because TA cells are defined as short-lived cells differentiating into mature cells<sup>27</sup>, we next  
276 addressed this issue regarding the proliferating Aire<sup>+</sup> CD80<sup>hi</sup> mTECs. *In vivo* pulse-labeling of  
277 TECs with 5-bromo-2'-deoxyuridine (BrdU) was performed. Because mCherry<sup>hi</sup> cells and  
278 mCherry<sup>lo</sup> were generally in G0 and G1 stages of the cell cycle, respectively<sup>47</sup>, each fraction in  
279 CD80<sup>hi</sup> mTECs was sorted separately after *i.p* administration of BrdU, and thereafter stained  
280 with anti-BrdU antibody (Figure 5A). This procedure was necessary because mCherry  
281 fluorescence is lost after BrdU staining. Flow cytometric analysis showed that approximately  
282 35% of mCherry<sup>lo</sup> CD80<sup>hi</sup> mTECs (hereafter referred as to mCherry<sup>lo</sup>) were labeled at 12 h (Day  
283 0.5) after the BrdU injection (Figure 5B). In contrast, about 3% of mCherry<sup>hi</sup> CD80<sup>hi</sup> mTECs  
284 (referred as to mCherry<sup>hi</sup>) were BrdU-positive (Figure 5B). Thus, as expected, cell cycle  
285 progression of mCherry<sup>lo</sup> is much faster than mCherry<sup>hi</sup>. Importantly, cell number and the ratio

286 of BrdU-positive cells in the mCherry<sup>lo</sup> fraction was significantly decreased 3.5 days after the  
287 BrdU injection (Figure 5B and C). On the other hand, the frequency of BrdU-positive cells in  
288 mCherry<sup>hi</sup> was increased by day 3.5, and plateaued from day 3.5 to day 6.5 (Figure 5B and C).  
289 Notably, fluorescence intensity (MFI) of BrdU staining in mCherry<sup>hi</sup> at Day 3.5 was about 50%  
290 lower than that in mCherry<sup>lo</sup> at Day 0.5 (Figure 5D), suggesting that mCherry<sup>hi</sup> at day 3.5 were  
291 generated after cell division. Overall, these data suggest that mCherry<sup>lo</sup> are transiently  
292 proliferating, and after cell division, they are converted to mCherry<sup>hi</sup> having low proliferative  
293 activity.

294

295 To verify that mCherry<sup>lo</sup> cells are precursors of mCherry<sup>hi</sup>, we performed an *in vitro*  
296 reaggregation thymic organ culture (RTOC) experiment (Figure 6A). The mCherry<sup>lo</sup> fraction  
297 (Figure 6—figure supplement 1) was reaggregated with wild type embryonic thymic cells. After  
298 5-days of culture, mCherry<sup>hi</sup> was detected in RTOC (Figure 6A). Because Venus<sup>+</sup>mCherry<sup>lo</sup> cells  
299 were practically absent in RTOC (Figure 6—figure supplement 1A), survived mCherry<sup>lo</sup> cells  
300 were mostly converted into mCherry<sup>hi</sup> in RTOC. Interestingly, reaggregation with allogenic fetal  
301 thymus (Balb/cA background) was not sufficient for the conversion to mCherry<sup>hi</sup> (Figure  
302 6—figure supplement 1B), implying that high affinity interaction between TCR and MHC  
303 contributes to survival and maintenance of mCherry<sup>lo</sup> TECs as described previously<sup>48</sup>. Next, we  
304 sorted mCherry<sup>hi</sup> cells in the RTOC (referred as to mCherry<sup>hi</sup>-RTOC) in addition to mCherry<sup>lo</sup>  
305 and mCherry<sup>hi</sup> from the Fucci thymus, and analyzed gene expression by RNA-seq. As expected,  
306 the mCherry<sup>lo</sup> fraction expressed a lower level of Aire-dependent TSAs, compared to mCherry<sup>hi</sup>  
307 (Figure 6B), although Aire and Mki67 were highly expressed (Figure 6C). Importantly, in  
308 comparison to the mCherry<sup>lo</sup> fraction, the mCherry<sup>hi</sup>-RTOC fraction showed higher levels of  
309 Aire-dependent TSAs (Figure 6B). Moreover, beside cell-cycle-related genes, some genes were  
310 highly expressed in all mCherry<sup>lo</sup>, Venus<sup>+</sup> cells, and cluster R1 cells (Figure 6—figure  
311 supplement 2 and Supplementary Table 4). Notably, these gene set were down-regulated in  
312 mCherry<sup>hi</sup>-RTOC (Figure 6C and Figure 6—figure supplement 2). These data suggest that  
313 mCherry<sup>lo</sup> cells were converted into mCherry<sup>hi</sup> in RTOC.

314

315 In order to detail phenotypes of mCherry<sup>hi</sup>-RTOC, we next performed well-based scRNA-seq.  
316 mCherry<sup>hi</sup>-RTOC in addition to mCherry<sup>lo</sup>CD80<sup>hi</sup> and mCherry<sup>hi</sup>CD80<sup>hi</sup> mTECs from the  
317 murine thymus were single-cell sorted by flow cytometry, and then gene expression in  
318 individual cells was determined by random displacement amplification sequencing



319 (RamDA-seq) technology<sup>49</sup>. After quality control of the data, gene expression matrix data of  
320 single-cell RamDA-seq (scRamDA-seq) were integrated with the droplet-based scRNA-seq data  
321 (Figure 6D). Although this integration slightly changed the UMAP dimension and clustering  
322 compared to Figure 2, assignment of each cluster was successfully achieved in the practically  
323 same fashion (Supplementary Figure 7E and F), except that cluster R15 (s-TEC) in Figure 3 was  
324 incorporated into cluster R10 (mTEC IIIb) and one new cluster were separated from cluster R2  
325 and R3.

326  
327 Cells from the mCherry<sup>lo</sup>CD80<sup>hi</sup> mTEC fraction (total 36 cells) were assigned mainly to clusters  
328 R1 (17 cells) and R9 (11 cells) (Figure 6E and F, and Supplementary Table 5). Some cells were  
329 assigned to clusters R0 (3 cells) and R2 (2 cells). Although other cells were assigned to clusters  
330 R4, R7 and R14, the embedded position was separated from each parent cluster, which may be  
331 due to misclustering. In contrast, cells in the mCherry<sup>hi</sup>CD80<sup>hi</sup> mTEC fraction (total 35 cells)  
332 were more heterogenous and consisted of cells assigned mainly to clusters R0 (7 cells), R3 (9  
333 cells), R5 (4 cells), R7 (3 cells), R10/15 (5 cells), and R13 (2 cells) (Figure 6E and F, and  
334 Supplementary Table 5). Except for cluster R5, these clusters were concordant with Aire<sup>+</sup>  
335 mTECs, post-Aire mTECs, and GP2<sup>+</sup> TECs. Notably, after the RTOC, heterogenous cell  
336 populations including clusters R0 (18 cells), R3 (13 cells), R5 (5 cells), R6 (3 cells), R7 (8 cells)  
337 and R10/15 (5 cells) were found in the mCherry<sup>hi</sup>-RTOC population (total 65 cells). Its  
338 composition was relatively similar to that of the mCherry<sup>hi</sup>CD80<sup>hi</sup> mTEC fraction (Figure 6F).  
339 Moreover, these mCherry<sup>hi</sup>-RTOC cells expressed high levels of TSAs (Figure 6G).  
340 Interestingly, 5 cells in mCherry<sup>hi</sup>-RTOC were assigned to cluster R5, which also reside in the  
341 mCherry<sup>hi</sup>CD80<sup>hi</sup> mTEC fraction from the adult thymus. This finding is consistent with the idea  
342 of an “intertypical” mTEC cluster, which reportedly contains both CD80<sup>hi</sup> mTECs and  
343 CD80<sup>lo</sup> mTECs<sup>26</sup>. Overall, these data suggest that mCherry<sup>lo</sup>CD80<sup>hi</sup> mTECs differentiate into  
344 quiescent mature mTECs expressing high levels of TSAs, including Aire<sup>+</sup> mTECs (mTEC II),  
345 post-Aire mTECs (mTEC III), and tuft-like mTECs (mTEC IV).

346  
347 *Proliferating Aire<sup>+</sup> mTECs are present after puberty in mice*

348 We investigated whether proliferative Aire<sup>+</sup> mTECs persisted in the thymi of older mice. TECs  
349 were analyzed in 4-week-old, 8-week-old, and 19-week-old Fucci Aire-GFP mice. Flow  
350 cytometric analysis showed that a Venus<sup>+</sup> mTEC<sup>hi</sup> subset was present in 19-week-old mice as  
351 well as younger mice (Figure 7A). Moreover, Venus<sup>+</sup> mTEC<sup>hi</sup> cells expressed Aire genes (Figure

352 7A). These data strongly suggested that transit amplifying TECs persist in the adult thymus as a  
353 source of mature mTECs.

354

355 Integrative computational analysis of our scRNA-seq data with a previously reported dataset of  
356 fetal TECs (E12 to E18) showed considerably different cell embedding between adult TECs and  
357 fetal TECs (Figure 7—figure supplement 1). A TEC-expressing subset was present in the fetal  
358 thymus whereas Aire expression was low (Clusters F3 and F12, Figure 6—figure supplement 2).  
359 This implies that fetal proliferating mTECs may have a different gene expression profile than  
360 adult proliferating Aire<sup>+</sup>CD80<sup>hi</sup> mTECs (Figure 6—figure supplement 2).

361

## 362 **Discussion**

363 With regard to mTEC differentiation in the adult thymus (Figure 7B), we hypothesize that Aire<sup>+</sup>  
364 TA-TECs were generated from their Aire-negative progenitors. Aire<sup>+</sup> TA-TECs (cluster 3)  
365 undergo cell division and then differentiate into quiescent Aire<sup>+</sup> mTECs (cluster 0) through a  
366 transition stage, which corresponds to cluster R9 in scRNA-seq data. This differentiation  
367 process is accompanied by a chromatin structure change. Post-mitotic Aire<sup>+</sup> mTECs begin  
368 high-level TSA expression, and further differentiate into post-Aire mTECs (R7, R10 and R13)  
369 by closing the Aire-enhancer region. Differentiation of mTECs expressing TSAs may have to  
370 coordinate differentiation with cell cycle regulation, as proposed in neural cells and muscle  
371 differentiation<sup>50</sup>.

372

373 Generally, in other tissues, transit-amplifying cells constitute a link between stem cells and  
374 mature cells<sup>42</sup>. An important question is what cells differentiate into proliferating Aire<sup>+</sup> mTECs.  
375 Previous studies have suggested that mTECs<sup>lo</sup> expressing low levels of maturation markers (i.e.  
376 CD80 or MHC II) are precursors<sup>1,13</sup>. However, several recent studies have suggested that  
377 mTEC<sup>lo</sup> contains several subsets, including CCL21a-positive mTECs, tuft-like mTECs, and  
378 others. One possible explanation for this is that a small number of mTEC stem cells or other  
379 precursor cells may be present in the mTEC<sup>lo</sup> subset<sup>13</sup>. Consistently RNA velocity analysis also  
380 suggested that most mTEC<sup>lo</sup> cells do not appear to differentiate into Aire-expressing mTECs.  
381 Given that transit-amplifying mTECs are present, a small number of stem/precursor cells would  
382 theoretically be sufficient for mTEC reconstitution. A previous study proposed that TECs  
383 expressing claudin 3/4 and SSEA-1 had characteristic features of mTEC stem cells in  
384 embryonic thymus<sup>20</sup>. We failed to detect a corresponding cluster of mTEC stem cells as a



385 subset of adult scRNA clusters. This may be because corresponding mTEC stem cells in adult  
386 thymus are included in the “intertypical” TEC cluster, which may be a mixture of various TECs  
387 <sup>26</sup>. More detailed characterization of mTEC stem cells in the adult thymus is necessary to  
388 illuminate the differentiation dynamics of mTECs.

389

390 Overall, the scRNA-seq analysis in the present study suggested the presence of a novel  
391 differentiation process of TECs in the adult thymus. Disturbance of adult TEC homeostasis may  
392 cause thymoma, autoimmunity, and other diseases. Further characterization of molecular  
393 mechanisms underlying differentiation and maintenance processes in TECs will aid the  
394 development of novel therapeutic strategies against these thymus-related diseases.

395

## 396 **Materials and Methods**

### 397 *Mice*

398 C57BL/6 mice were purchased from Clea Japan. Littermates or age-matched, wild-type mice  
399 from the same colonies as the mutant mice were used as controls. *Aire-GFP* mice (CDB0479K,  
400 [http://www2.brc.riken.jp/lab/animal/detail.php?brc\\_no=03515](http://www2.brc.riken.jp/lab/animal/detail.php?brc_no=03515)) and  
401 B6;129-Gt(ROSA)26Sor<tm1(Fucci2aR)Jkn> (RBRC06511) (Fucci2a) <sup>32</sup> were provided by the  
402 RIKEN BRC through the National Bio-Resource Project of the MEXT, in Japan. CAG-Cre  
403 transgenic mice were kindly provided by Dr. Jun-ichi Miyazaki <sup>51</sup>. B6(Cg)-Foxn1tm3(cre)Nrm/J  
404 are from Jackson Laboratory<sup>52</sup>. Fucci2a mice were crossed with CAG-Cre or Foxn1-Cre mice to  
405 activate mCherry and Venus expression. Fucci mice crossed with CAG-Cre were used for all  
406 experiments except for immunostaining experiments (Figure 4). All mice were maintained  
407 under specific pathogen-free conditions and handled in accordance with Guidelines of the  
408 Institutional Animal Care and Use Committee of RIKEN, Yokohama Branch (2018-075).  
409 Almost all of available mutant and control mice were randomly used for experiments without  
410 any selection.

411

### 412 *Preparation of TEC suspensions and flow cytometry analysis*

413 Murine thymi were minced using razor blades. Thymic fragments were then pipetted up and  
414 down to remove lymphocytes. Then fragments were digested in RPMI 1640 medium containing  
415 Liberase™ (Roche, 0.05 U/mL) plus DNase I (Sigma-Aldrich) via incubation at 37°C for 12 min  
416 three times. Single-cell suspensions were stained with anti-mouse antibodies. Dead cells were  
417 excluded via 7-aminoactinomycin D staining. Cells were sorted using a FACS Aria instrument

418 (BD). Post-sorted cell subsets were determined to contain > 95% of the relevant cell types. Data  
419 were analyzed using Flowjo 10. No data points or mice were excluded from the study.  
420 Randomization and blinding were not used.

421

#### 422 *Droplet-based scRNA-seq analysis*

423 For scRNA-seq analysis, cell suspensions of thymi from 3 mice were prepared and pooled for  
424 each individual scRNA-seq experiment. Two experiments were performed. Cellular suspensions  
425 were loaded onto a Chromium instrument (10× Genomics) to generate a single-cell emulsion.  
426 scRNA-seq libraries were prepared using Chromium Single Cell 3' Reagent Kits v2 Chemistry  
427 and sequenced in multiplex on the Illumina HiSeq2000 platform (rapid mode). FASTQ files  
428 were processed using Fastp<sup>53</sup>. Reads were demultiplexed and mapped to the mm10 reference  
429 genome using Cell Ranger (v3.0.0). Processing of data with the Cell Ranger pipeline was  
430 performed using the HOKUSAI supercomputer at RIKEN and the NIG supercomputer at ROIS  
431 National Institute of Genetics. Expression count matrices were prepared by counting unique  
432 molecule identifiers. Downstream single-cell analyses (integration of two datasets, correction of  
433 dataset-specific batch effects, UMAP dimension reduction, cell cluster identification, conserved  
434 marker identification, and regressing out cell cycle genes) were performed using Seurat (v3.0)<sup>54</sup>.  
435 Briefly, cells that contained a percentage of mitochondrial transcripts > 15% were filtered out.  
436 Genes that were expressed in more than 5 cells and cells expressing at least 200 genes were  
437 selected for analysis. Two scRNA-seq datasets were integrated with a combination of Find  
438 Integration Anchors and Integrate Data functions<sup>55</sup>. To investigate the effects of regressing out  
439 cell cycle genes on cell clustering, we compared three types of pre-processing; no regressing out,  
440 regressing out the difference between the G2/M and S phase scores, and complete regressing out  
441 of all cell cycle scores (Supplementary Fig. S3) after assigning cell cycle scores via the Cell  
442 Cycle Scoring function. The murine cell cycle genes equivalent to human cell cycle genes listed  
443 in Seurat were used for assigning cell cycle scores.

444

445 For comparison with a previously reported RNA sequence dataset obtained via a well-based  
446 study<sup>23</sup>, the expression matrix of unique molecule identifiers was used. Integration of the two  
447 datasets was performed using the Seurat package as described above. RNA velocity analysis  
448 was performed using velocity. Bam/sam files obtained from the Cell Ranger pipeline were  
449 transformed to loom format on velocity.py. RNA velocity was estimated and visualized using  
450 loom files by the velocity R package and pagoda2.

451

452

453 *Droplet-based scATAC-seq analysis*

454 In scRNA-seq analysis cell suspensions of thymi from 3 mice were prepared and pooled for  
455 each individual scRNA-seq experiment. EpCAM<sup>+</sup>CD45<sup>-</sup>TER119<sup>-</sup> fraction was collected by  
456 using cell sorter (BD Aria). After washing with PBS containing 0.04% BSA, sorted cells were  
457 suspended in lysis buffer containing 10mM Tris-HCl (pH 7.4), 10 mM NaCl, 3 mM MgCl<sub>2</sub>,  
458 0.1% Tween-20, 0.1% NP-40, 0.01% Digitonin, and 1% BSA on ice for 3 min. Wash buffer  
459 containing 10mM Tris-HCl (pH 7.4), 10 mM NaCl, 3 mM MgCl<sub>2</sub>, 0.1% Tween-20, and 1%  
460 BSA was added to the lysed cells. After centrifuging the solution, a nuclear pellet was obtained  
461 by removing the supernatant and the pellet was re-suspended in wash buffer. The concentration  
462 of nuclei and their viability were determined by staining with acridine orange/propidium iodide,  
463 and 10,000 nuclear suspensions were loaded onto a Chromium instrument (10× Genomics) to  
464 generate a single-cell emulsion. scATAC-seq libraries were prepared using Chromium Next  
465 GEM Single Cell ATAC Reagent Kits v1.1 and sequenced in multiplex on an Illumina HiSeq X  
466 ten platform. Reads were demultiplexed and mapped to the mm10 reference genome with Cell  
467 Ranger ATAC. Processing data with the Cell Ranger pipeline was performed using the NIG  
468 supercomputer at ROIS National Institute of Genetics. Downstream single-cell analyses  
469 (integration of two datasets, correction of dataset-specific batch effects, UMAP dimension  
470 reduction, cell cluster identification, conserved marker identification, and regressing out cell  
471 cycle genes) were performed using Seurat (v3.0)<sup>54</sup>. Briefly, cells that contained a percentage of  
472 mitochondrial transcripts > 15% were filtered out. Genes that were expressed in more than 5  
473 cells and cells expressing at least 200 genes were selected for analysis. Two scRNA-seq datasets  
474 were integrated with a combination of Find Integration Anchors and Integrate Data functions<sup>55</sup>.  
475 To investigate the effects of regressing out cell cycle genes on cell clustering, we compared  
476 three types of pre-processing; no regressing out, regressing out the difference between the G2/M  
477 and S phase scores, and complete regressing out of all cell cycle scores after assigning cell cycle  
478 scores via the Cell Cycle Scoring function. The murine cell cycle genes equivalent to human  
479 cell cycle genes listed in Seurat were used for assigning cell cycle scores.

480

481 *Well-based scRNA-seq analysis*

482 Single-cells were sorted into PCR tubes containing 1µl of cell lysis solution (1:10 Cell Lysis

483 buffer(Roche), 10U/ $\mu$ L Rnasin plus Ribonuclease inhibitor (Promega) using a cell sorter, shaken  
484 at 1400 rpm for 1 min with a thermo mixer, and then stored at  $-80^{\circ}\text{C}$ . Cell lysates were  
485 denatured at  $70^{\circ}\text{C}$  for 90 s and held at  $4^{\circ}\text{C}$  until the next step. To eliminate genomic DNA  
486 contamination, 1  $\mu$ L of genomic DNA digestion mix (0.5 $\times$  PrimeScript Buffer, 0.2 U of DNase  
487 I Amplification Grade, in RNase-free water) was added to 1 $\mu$ L of the denatured sample. The  
488 mixtures were mixed by gentle tapping, incubated in a T100 thermal cycler at  $30^{\circ}\text{C}$  for 5 min  
489 and held at  $4^{\circ}\text{C}$  until the next step. One microliter of RT-RamDA mix (2.5 $\times$ PrimeScript Buffer,  
490 0.6 pmol oligo(dT)18, 8 pmol 1st-NSRs, 100 ng of T4 gene 32 protein, and 3 $\times$  PrimeScript  
491 enzyme mix in RNase-free water) was added to 2  $\mu$ L of the digested lysates. The mixtures were  
492 mixed with gentle tapping, and incubated at  $25^{\circ}\text{C}$  for 10 min,  $30^{\circ}\text{C}$  for 10 min,  $37^{\circ}\text{C}$  for  
493 30min,  $50^{\circ}\text{C}$  for 5 min, and  $94^{\circ}\text{C}$  for 5 min. Then, the mixtures were held at  $4^{\circ}\text{C}$  until the next  
494 step. After RT, the samples were added to 2  $\mu$ L of second-strand synthesis mix containing 2.25 $\times$   
495 NEB buffer 2 (NEB), 0.625mM each dNTP Mixture (NEB), 40 pmol 2nd-NSRs, and 0.75 U of  
496 Klenow Fragment (NEB) in RNase-free water. Mixtures were again mixed by gentle tapping,  
497 and incubated at  $16^{\circ}\text{C}$  for 60 min,  $70^{\circ}\text{C}$  10 min and then at  $4^{\circ}\text{C}$  until the next step. The  
498 above-described double-stranded cDNA was purified using 15  $\mu$ L of AMPure XP SPRI beads  
499 (Beckman Coulter) diluted 2-fold with Pooling buffer (20% PEG8000, 2.5 M NaCl, 10 mM  
500 Tris-HCl pH8.0, 1 mM EDTA, 0.01% NP40) and Magna Stand (Nippon Genetics). Washed  
501 AMPure XP beads attached to double-stranded cDNAs were directly eluted using 3.75  $\mu$ L of 1 $\times$   
502 Tagment DNA Buffer (10 mM Tris-HCl pH8.5, 5 mM  $\text{MgCl}_2$ , 10% DMF) and mixed well  
503 using a vortex mixer and pipetting. Diluted Tn5-linker complex was added to the eluate and the  
504 mixture was incubated at  $55^{\circ}\text{C}$  for 10 min, then 1.25 $\mu$ L of 0.2% SDS was added and incubated at  
505 room temperature for 5 min. After PCR for adaptor ligation, sequencing library DNA was  
506 purified using 1.0 $\times$  the volume of AMPure XP beads and eluted into 24  $\mu$ L of 10 mM Tris-Cl,  
507 pH 8.5.

508

#### 509 *Standard RNA sequencing analysis*

510 Total RNA was prepared using TRIzol reagent (Thermo Fisher Scientific) in accordance with

511 the manufacturer's protocol. After rRNA was depleted using the NEBNext rRNA Depletion Kit,  
512 the RNA sequence library was prepared using the NEBNext Ultra Directional RNA Library  
513 Prep Kit (New England Biolabs). Paired-end sequencing was performed with NextSeq500  
514 (Illumina). Sequence reads were quantified for annotated genes using CLC Genomics  
515 Workbench (Version 7.5.1; Qiagen). Gene expression values were cut off at a normalization  
516 expression threshold value of 3. Differential expression was assessed via empirical analysis with  
517 the DGE (edgeR test) tool in CLC Main Workbench, in which the Exact Test of Robinson and  
518 Smyth was used<sup>56</sup>. An FDR-corrected *p* value was used for testing statistics for  
519 RNA-sequencing analysis. Previously described lists of TSAs and Aire-dependent TSAs<sup>21</sup> were  
520 used for the analysis.

521

#### 522 *RTOC and RNA-seq analysis*

523 mCherry<sup>10</sup> cells ( $4 \times 10^4 \sim 1 \times 10^5$ ) were sorted from Fucci mice and subsequently re-aggregated  
524 with trypsin-digested thymic cells ( $1 \sim 2 \times 10^6$ ) from E15.5 wild-type mice. RTOCs were  
525 cultured on Nucleopore filters (Whatman) placed in R10 medium containing RPMI1640 (Wako)  
526 supplemented with 10% fetal bovine serum (FBS), 2 mM L-glutamine (Wako), 1× nonessential  
527 amino acids (NEAAs; Sigma-Aldrich), 0.1 pM cholera Toxin Solution (Wako 030-20621), 5  
528 µg/ml Insulin solution from bovine pancreas (SIGMA I0516-5ML), 2 nM Triiodo-L-thyronine  
529 (SIGMA T2877-100MG), 1000 units/ml LIF (nacalai NU0012-1), 0.4 µg/ml hydrocortisone, 10  
530 ng/ml EGF (Gibco PMG8041), 1 µg/ml RANKL (Wako), penicillin-streptomycin mixed solution  
531 (Nacalai Tesque), and 50 µM 2-mercaptoethanol (Nacalai Tesque) for 5 days. For RNA-seq of  
532 RTOC experiments, random displacement amplification sequencing (RamDA-seq) were used<sup>49</sup>,  
533 which allows RNA-seq analysis of low numbers of cells. Briefly, sorted cells were lysed in TCL  
534 buffer (Qiagen). After purification of nucleic acids by Agencourt RNA Clean XP (Beckman  
535 Coulter) and subsequent treatment with DNase I, the RT-RamDA mixture containing 2.5x  
536 PrimeScript Buffer (TAKARA), 0.6 µM oligo(dT)18 (Thermo), 10 µM 1<sup>st</sup> NSR primer mix, 100  
537 µg/mL of T4 gene 32 protein, and 3× PrimeScript enzyme mix (TAKARA) were added to the  
538 purified nucleic acids for reverse transcription. Samples were added to second-strand synthesis  
539 mix containing 2× NEB buffer 2 (NEB), 625 nM dNTP Mixture (NEB), 25 µM 2<sup>nd</sup> NSR  
540 primers, and 375 U/mL of Klenow Fragment (3'-5' exo-) (NEB). After cDNA synthesis and  
541 subsequent purification by AMPure XP (Beckman Coulter), sequencing library DNA was  
542 prepared using the Tn5 tagmentation-based method. Single-read sequencing was performed  
543 using a HiSeq2500 (v4, high out mode). Sequence reads were quantified for annotated genes

544 using CLC Genomics Workbench (Version 7.5.1; Qiagen).

545

#### 546 *Immunohistochemistry*

547 The thymus was fixed with 4% paraformaldehyde and frozen in OCT compound. After washing  
548 cryosections (5  $\mu$ m) with PBS, sections were blocked with 10% normal goat serum. Keratin-5  
549 was detected using a combination of a polyclonal rabbit anti-mouse keratin-5 antibody (1:500)  
550 and AlexaFluor647-donkey-anti-rabbit IgG. Aire was detected using a labeled monoclonal  
551 antibody (1:300). Confocal color images were obtained using a LAS X (Leica) microscope.

552

#### 553 *Immunocytochemistry*

554 Thymic cell suspensions prepared via Liberase™ digestion were stained with anti-CD45-PE and  
555 anti-TER119-PE. After depletion of labeled CD45<sup>+</sup> and TER119<sup>+</sup> cells via anti-PE microbeads  
556 and a magnetic-activated cell sorting separator, negatively selected cells were stained with  
557 anti-EpCAM (CD326), anti-CD80, anti-Ly51, and UEA-1. Venus<sup>+</sup> CD80<sup>hi</sup> mTECs were sorted  
558 and spun down on glass slides using a Cytospin. The slides were then fixed with acetone and  
559 stained with anti-Aire antibody and DAPI for nuclear staining. Confocal images were obtained  
560 using an LAS X microscope.

561

#### 562 *Statistical analysis*

563

564 Statistically significant differences between mean values were determined using Student's t-test  
565 (\*\*P < 0.001, \*\*P < 0.01 and \* P < 0.05). Principle component analysis was performed using  
566 the prcomp function in R-project. The sample size was not predetermined by statistical methods  
567 but based on common practice and previous studies<sup>6,57</sup>. All replicates are biological replication.  
568 All outliers were included in data.

569

#### 570 **Data availability**

571 FASTQ data of RNA-Seq and ATAC-seq are deposited in DDBJ (DRA009125 DRA010209  
572 DRA12308, DRA12309 and DRA012452). Any additional information required to reanalyze  
573 the data reported in this paper was up-loaded as a zip file of Source\_data.

574

#### 575 **Acknowledgments**

576 This work was supported by Grants-in-Aid for Scientific Research from JSPS (17H04038,  
577 17K08622, 20K07332, 20H03441) (T.A., N.A.), grants from the Princess Takamatsu Cancer  
578 Research Fund (T.A.), The Uehara Memorial Foundation (T.A.), and The Novartis Foundation  
579 for the Promotion of Science (T.A.), and a Grant-in-Aid for Scientific Research in Innovative  
580 Areas from MEXT (18H04989, 19H04821) (T.A., N.A.). CREST from Japan Science and  
581 Technology Agency (JPMJCR2011) (T.A.). The authors declare no competing financial interests.  
582 We thank the sequencing staff at the RIKEN Center for Integrative Medical Sciences for  
583 assisting with RNA-seq. Computations were partially performed on the NIG supercomputer at  
584 ROIS, National Institute of Genetics.

585

#### 586 **Author contributions**

587 T.M, MM, TI, MY, HY, AI, and EO performed experiments and analyzed data. TK, TWT, SH,  
588 KH, YT, and TS analyzed data. HI and NY established mutant mouse lines. ASS, AM, and AK  
589 contributed to data analysis and interpretation. NA and TA designed the study, analyzed data,  
590 and wrote the manuscript.

591

#### 592 **Competing interests**

593 The authors declare no competing interests.

594

595

596 **Supplementary Table 1.** Integration of scRNA-seq cluster and scATAC-seq cluster

597 **Supplementary Table 2.** Open regions in cluster 3 as compared to cluster 0 in scATAC-seq.

598 **Supplementary Table 3.** GO analysis of genes differentially expressed in Venus+ cells

599 **Supplementary Table 4.** Possible marker gene candidates for transit amplifying TECs.

600 **Supplementary Table 5.** Summary for assignment of individual single cells in scRamDa-seq of  
601 mCherry<sup>hi</sup>, mCherry<sup>lo</sup>, and mCherry<sup>hi</sup>-RTOC

602



603 **References**

- 604 1. Abramson, J. & Anderson, G. Thymic Epithelial Cells. *Annu Rev Immunol* **35**, 85-118  
605 (2017).  
606
- 607 2. Inglesfield, S., Cosway, E.J., Jenkinson, W.E. & Anderson, G. Rethinking Thymic  
608 Tolerance: Lessons from Mice. *Trends in Immunology* **40**, 279-291 (2019).  
609
- 610 3. Anderson, M.S. *et al.* Projection of an immunological self shadow within the thymus by  
611 the aire protein. *Science* **298**, 1395-1401 (2002).  
612
- 613 4. Takaba, H. *et al.* Fezf2 Orchestrates a Thymic Program of Self-Antigen Expression for  
614 Immune Tolerance. *Cell* **163**, 975-987 (2015).  
615
- 616 5. Rossi, S.W. *et al.* RANK signals from CD4(+)3(-) inducer cells regulate development of  
617 Aire-expressing epithelial cells in the thymic medulla. *J Exp Med* **204**, 1267-1272  
618 (2007).  
619
- 620 6. Akiyama, N. *et al.* Identification of embryonic precursor cells that differentiate into  
621 thymic epithelial cells expressing autoimmune regulator. *J Exp Med* **213**, 1441-1458  
622 (2016).  
623
- 624 7. Akiyama, T. *et al.* Dependence of self-tolerance on TRAF6-directed development of  
625 thymic stroma. *Science* **308**, 248-251 (2005).  
626
- 627 8. Akiyama, T. *et al.* The tumor necrosis factor family receptors RANK and CD40  
628 cooperatively establish the thymic medullary microenvironment and self-tolerance.  
629 *Immunity* **29**, 423-437 (2008).  
630
- 631 9. Hikosaka, Y. *et al.* The cytokine RANKL produced by positively selected thymocytes  
632 fosters medullary thymic epithelial cells that express autoimmune regulator. *Immunity*  
633 **29**, 438-450 (2008).  
634
- 635 10. Mouri, Y. *et al.* Lymphotoxin signal promotes thymic organogenesis by eliciting RANK



- 636 expression in the embryonic thymic stroma. *J Immunol* **186**, 5047-5057 (2011).  
637
- 638 11. Kajiura, F. *et al.* NF-kappa B-inducing kinase establishes self-tolerance in a thymic  
639 stroma-dependent manner. *J Immunol* **172**, 2067-2075 (2004).  
640
- 641 12. Gabler, J., Arnold, J. & Kyewski, B. Promiscuous gene expression and the  
642 developmental dynamics of medullary thymic epithelial cells. *Eur J Immunol* **37**,  
643 3363-3372 (2007).  
644
- 645 13. Gray, D., Abramson, J., Benoist, C. & Mathis, D. Proliferative arrest and rapid turnover  
646 of thymic epithelial cells expressing Aire. *J Exp Med* **204**, 2521-2528 (2007).  
647
- 648 14. Gray, D.H. *et al.* Developmental kinetics, turnover, and stimulatory capacity of thymic  
649 epithelial cells. *Blood* **108**, 3777-3785 (2006).  
650
- 651 15. Metzger, T.C. *et al.* Lineage Tracing and Cell Ablation Identify a Post-Aire-Expressing  
652 Thymic Epithelial Cell Population. *Cell Reports* **5**, 166-179 (2013).  
653
- 654 16. Michel, C. *et al.* Revisiting the Road Map of Medullary Thymic Epithelial Cell  
655 Differentiation. *J Immunol* **199**, 3488-3503 (2017).  
656
- 657 17. Nishikawa, Y. *et al.* Temporal lineage tracing of Aire-expressing cells reveals a  
658 requirement for Aire in their maturation program. *J Immunol* **192**, 2585-2592 (2014).  
659
- 660 18. Wang, X. *et al.* Post-Aire maturation of thymic medullary epithelial cells involves  
661 selective expression of keratinocyte-specific autoantigens. *Front Immunol* **3**, 19 (2012).  
662
- 663 19. White, A.J. *et al.* Lymphotoxin signals from positively selected thymocytes regulate the  
664 terminal differentiation of medullary thymic epithelial cells. *J Immunol* **185**, 4769-4776  
665 (2010).  
666
- 667 20. Sekai, M., Hamazaki, Y. & Minato, N. Medullary thymic epithelial stem cells maintain  
668 a functional thymus to ensure lifelong central T cell tolerance. *Immunity* **41**, 753-761

- 669 (2014).  
670  
671 21. Sansom, S.N. *et al.* Population and single-cell genomics reveal the Aire dependency,  
672 relief from Polycomb silencing, and distribution of self-antigen expression in thymic  
673 epithelia. *Genome Res* **24**, 1918-1931 (2014).  
674  
675 22. Meredith, M., Zemmour, D., Mathis, D. & Benoist, C. Aire controls gene expression in  
676 the thymic epithelium with ordered stochasticity. *Nat Immunol* **16**, 942-949 (2015).  
677  
678 23. Bornstein, C. *et al.* Single-cell mapping of the thymic stroma identifies IL-25-producing  
679 tuft epithelial cells. *Nature* **559**, 622-626 (2018).  
680  
681 24. Miller, C.N. *et al.* Thymic tuft cells promote an IL-4-enriched medulla and shape  
682 thymocyte development. *Nature* **559**, 627-631 (2018).  
683  
684 25. Dhalla, F. *et al.* Biologically indeterminate yet ordered promiscuous gene expression in  
685 single medullary thymic epithelial cells. *EMBO J* **39**, e101828 (2020).  
686  
687 26. Baran-Gale, J. *et al.* Ageing compromises mouse thymus function and remodels  
688 epithelial cell differentiation. *Elife* **9** (2020).  
689  
690 27. Lajtha, L.G. Stem cell concepts. *Differentiation* **14**, 23-34 (1979).  
691  
692 28. Clevers, H. The intestinal crypt, a prototype stem cell compartment. *Cell* **154**, 274-284  
693 (2013).  
694  
695 29. Hsu, Y.C., Li, L. & Fuchs, E. Transit-amplifying cells orchestrate stem cell activity and  
696 tissue regeneration. *Cell* **157**, 935-949 (2014).  
697  
698 30. Lui, J.H., Hansen, D.V. & Kriegstein, A.R. Development and evolution of the human  
699 neocortex. *Cell* **146**, 18-36 (2011).  
700  
701 31. Wells, K.L. *et al.* Combined transient ablation and single cell RNA sequencing reveals

- 702 the development of medullary thymic epithelial cells. *Elife* **9** (2020).
- 703
- 704 32. Mort, R.L. *et al.* Fucci2a: A bicistronic cell cycle reporter that allows Cre mediated  
705 tissue specific expression in mice. *Cell Cycle* **13**, 2681-2696 (2014).
- 706
- 707 33. LaFlam, T.N. *et al.* Identification of a novel cis-regulatory element essential for immune  
708 tolerance. *J Exp Med* **212**, 1993-2002 (2015).
- 709
- 710 34. Lucas, B. *et al.* Diversity in medullary thymic epithelial cells controls the activity and  
711 availability of iNKT cells. *Nat Commun* **11**, 2198 (2020).
- 712
- 713 35. Nakagawa, Y. *et al.* Thymic nurse cells provide microenvironment for secondary T cell  
714 receptor alpha rearrangement in cortical thymocytes. *P Natl Acad Sci USA* **109**,  
715 20572-20577 (2012).
- 716
- 717 36. Onder, L. *et al.* Alternative NF-kappa B signaling regulates mTEC differentiation from  
718 podoplanin-expressing presursors in the cortico-medullary junction. *Eur J Immunol* **45**,  
719 2218-2231 (2015).
- 720
- 721 37. Orosz, F. & Ovadi, J. TPPP orthologs are ciliary proteins. *FEBS Lett* **582**, 3757-3764  
722 (2008).
- 723
- 724 38. Beckers, A. *et al.* The evolutionary conserved FOXJ1 target gene Fam183b is essential  
725 for motile cilia in *Xenopus* but dispensable for ciliary function in mice. *Sci Rep* **8**,  
726 14678 (2018).
- 727
- 728 39. Khosla, S. & Ovalle, W.K. Morphology and distribution of cystic cavities in the normal  
729 murine thymus. *Cell Tissue Res* **246**, 531-542 (1986).
- 730
- 731 40. Park, J.E. *et al.* A cell atlas of human thymic development defines T cell repertoire  
732 formation. *Science* **367** (2020).
- 733
- 734 41. La Manno, G. *et al.* RNA velocity of single cells. *Nature* **560**, 494-498 (2018).

735

736 42. Zhang, B. & Hsu, Y.C. Emerging roles of transit-amplifying cells in tissue regeneration  
737 and cancer. *Wires Dev Biol* **6** (2017).

738

739 43. Lazzeri, E. *et al.* Endocycle-related tubular cell hypertrophy and progenitor  
740 proliferation recover renal function after acute kidney injury. *Nat Commun* **9** (2018).

741

742 44. Wong, F.K. *et al.* Pyramidal cell regulation of interneuron survival sculpts cortical  
743 networks. *Nature* **557**, 668-+ (2018).

744

745 45. Antonica, F., Orietti, L.C., Mort, R.L. & Zernicka-Goetz, M. Concerted cell divisions in  
746 embryonic visceral endoderm guide anterior visceral endoderm migration. *Dev Biol* **450**,  
747 132-140 (2019).

748

749 46. Yano, M. *et al.* Aire controls the differentiation program of thymic epithelial cells in the  
750 medulla for the establishment of self-tolerance. *J Exp Med* **205**, 2827-2838 (2008).

751

752 47. Tomura, M. *et al.* Contrasting quiescent G0 phase with mitotic cell cycling in the mouse  
753 immune system. *PLoS One* **8**, e73801 (2013).

754

755 48. Irla, M. *et al.* Autoantigen-specific interactions with CD4+ thymocytes control mature  
756 medullary thymic epithelial cell cellularity. *Immunity* **29**, 451-463 (2008).

757

758 49. Hayashi, T. *et al.* Single-cell full-length total RNA sequencing uncovers dynamics of  
759 recursive splicing and enhancer RNAs. *Nat Commun* **9**, 619 (2018).

760

761 50. Ruijtenberg, S. & van den Heuvel, S. Coordinating cell proliferation and differentiation:  
762 Antagonism between cell cycle regulators and cell type-specific gene expression. *Cell*  
763 *Cycle* **15**, 196-212 (2016).

764

765 51. Sakai, K. & Miyazaki, J. A transgenic mouse line that retains Cre recombinase activity  
766 in mature oocytes irrespective of the cre transgene transmission. *Biochem Biophys Res*  
767 *Commun* **237**, 318-324 (1997).

768

769 52. Gordon, J. *et al.* Specific expression of lacZ and cre recombinase in fetal thymic  
770 epithelial cells by multiplex gene targeting at the Foxn1 locus. *BMC Dev Biol* **7**, 69  
771 (2007).

772

773 53. Chen, S.F., Zhou, Y.Q., Chen, Y.R. & Gu, J. fastp: an ultra-fast all-in-one FASTQ  
774 preprocessor. *Bioinformatics* **34**, 884-890 (2018).

775

776 54. Butler, A., Hoffman, P., Smibert, P., Papalexi, E. & Satija, R. Integrating single-cell  
777 transcriptomic data across different conditions, technologies, and species. *Nat*  
778 *Biotechnol* **36**, 411-+ (2018).

779

780 55. Stuart, T. *et al.* Comprehensive Integration of Single-Cell Data. *Cell* **177**, 1888-+  
781 (2019).

782

783 56. Robinson, M.D. & Smyth, G.K. Small-sample estimation of negative binomial  
784 dispersion, with applications to SAGE data. *Biostatistics* **9**, 321-332 (2008).

785

786 57. Akiyama, N. *et al.* Limitation of immune tolerance-inducing thymic epithelial cell  
787 development by Spi-B-mediated negative feedback regulation. *J Exp Med* **211**,  
788 2425-2438 (2014).

789

790

791

792

793

794

795 **Figure Legends**

796 **Figure 1. Droplet-based scATAC-seq analysis of TECs in 4-week-old mice**

797 **A.** UMAP plot of scATAC-seq data from TEC cells (EpCAM<sup>+</sup> CD45<sup>-</sup> TER119<sup>-</sup>) from  
798 4-week-old mice. Cell clusters are separated by colors and numbers in the plot. The graph on  
799 the right shows percentages of each cluster in the total number of cells detected (8413 cells).  
800 **B.** Chromatin accessibility of typical marker genes of TECs. Accessibility in each gene region is  
801 represented in red.  
802 **C.** Violin plot depicting chromatin accessibility in *Aire* and *Cd80* gene regions in each cluster.  
803 **D.** Pseudo-bulk accessibility tracks of the *Aire* gene region in each cluster (upper panels)  
804 and frequency of sequenced fragments within the *Aire* gene region of individual cells in cluster  
805 0, 1 and 2 (lower panels)

806

807 **Figure 2. Droplet-based scRNA-seq analysis of TECs in 4-week-old mice**

808 **A.** UMAP plot of scRNA-seq data from TEC cells (EpCAM<sup>+</sup> CD45<sup>-</sup> TER119<sup>-</sup>) from  
809 4-week-old mice. Cell clusters (R0 to R17) are indicated by colors and numbers in the plot. The  
810 graph on the right shows the percentages of each cluster in the total number of cells detected  
811 (11,792 cells).  
812 **B.** Violin plots depicting expression level of typical TEC marker genes in each cluster.

813

814 **Figure 3. Integrative analysis of scATAC-seq data and scRNA-seq data of TECs**

815 **A.** Gene expression was predicted from scATAC-seq data using Signac. Individual cells in the  
816 cluster from scATAC-data (cluster 0 to were assigned and transferred to the UMAP plot of  
817 scRNA-seq cluster (R0 to R17).  
818 **B.** Correlation between clusters derived from scATAC-seq and scRNA-seq datasets of TECs.  
819 Cell types were annotated in scATAC-data set of TECs by transferring clusters from an  
820 scRNA-seq dataset.  
821 **C.** Ratio of cells assigned to each scRNA-seq cluster in each scATAC cluster.

822

823 **Figure 4. A highly proliferative subset of Aire<sup>+</sup> CD80<sup>hi</sup> mTECs**

824 **A.** Schematic depiction of cell cycles and Fucci fluorescence.  
825 **B.** Flow cytometric analysis of TECs from Fucci2a mice crossed with Aire-GFP-reporter mice.  
826 The gating strategy is shown. Intensities of GFP to monitor Aire expression in each subset  
827 (Venus<sup>+</sup> CD80<sup>hi</sup> mTEC, Venus<sup>-</sup> CD80<sup>hi</sup> mTEC and CD80<sup>lo</sup> mTEC<sup>lo</sup>) are shown in the right

828 panels. Left, *Aire*<sup>gfp/+</sup>::Fucci2a; right, control::Fucci2a. Typical figures of 3-independent  
829 experiments are exhibited.

830 **C.** Immunostaining of a sorted Venus<sup>+</sup> CD80<sup>hi</sup> mTEC subset via anti-Aire antibody and DAPI  
831 (nucleus staining). Typical panels of 3-independent experiments are exhibited. Scale bars, 10  
832  $\mu\text{m}$

833 **D.** Immunostaining of thymic sections from Fucci2a mice with anti-Aire and anti-keratin-5  
834 (Krt5) antibodies. Typical panels of 3-independent experiments are exhibited. Scale bars, 10  $\mu\text{m}$

835 **E** Scatter plots of RNA sequencing data from Venus<sup>+</sup> CD80<sup>hi</sup> mTEC and Venus<sup>-</sup> CD80<sup>hi</sup> mTEC  
836 subsets. The left panel shows a plot of all detected genes and the right panel show TSA genes  
837 detected. N = 3.

838 **F.** A typical RNA sequencing tracks of *Aire*, typical Aire-dependent TSA genes (*Ins* and *Sst*),  
839 *Fezf2*, and *Top2a* (a marker of G2/M phase).

840 **G.** Scatter plots and volcano plots of RNA sequencing data from Venus<sup>+</sup> CD80<sup>hi</sup> mTEC and  
841 Venus<sup>-</sup> CD80<sup>hi</sup> mTEC subsets. Upper panels show Aire-dependent TSAs, lower panels show  
842 Aire-independent TSAs. Red dots in volcano plots indicate genes for which expression differed  
843 significantly (2-fold change and FDR  $P < 0.05$ ) in Venus<sup>+</sup> and Venus<sup>-</sup> CD80<sup>hi</sup> mTEC subsets.  
844 Numbers of differentially expressed genes are shown in the panels. N = 3. Y axis is log<sub>10</sub> of  
845 FDR P-value.

846

847 **Figure 5. Fate mapping study by *in vivo* BrdU pulse-labeling of Fucci TECs**

848 **A.** Schematic procedure of *in vivo* BrdU pulse-labeling of Fucci mouse, and analysis of BrdU  
849 staining in mCherry<sup>hi</sup>CD80<sup>hi</sup> and mCherry<sup>lo</sup>CD80<sup>hi</sup> mTECs by flow cytometric analysis. BrdU  
850 staining was done after sorting each cell fraction.

851 **B.** Typical flow cytometric profile of BrdU staining in mCherry<sup>lo</sup>CD80<sup>hi</sup> mTECs (upper panels)  
852 and mCherry<sup>hi</sup>CD80<sup>hi</sup> mTECs (lower panels) at Days 0.5, 3.5, and 6.5 after the BrdU injection.  
853 Data for the ratio of BrdU<sup>+</sup> cells in each mTEC fraction are summarized in right figures. N = 7  
854 for 0.5 day after the BrdU injection, N = 3 for 3.5 day and 6.5 day after the injection. Two-tailed  
855 Student's t-tests. \*\*  $P < 0.01$  and \*  $P < 0.05$ . NS, not significant ( $P > 0.05$ ).  $P = 1.5 \times 10^{-3}$  for the  
856 upper figure and  $P = 0.033$  for the lower figure.

857 **C.** Cell number of BrdU<sup>+</sup>mCherry<sup>lo</sup>CD80<sup>hi</sup> mTECs and BrdU<sup>+</sup>mCherry<sup>hi</sup>CD80<sup>hi</sup> mTECs at Days  
858 0.5, 3.5, and 6.5 after the BrdU injection. Two-tailed Student's t-tests. \*\*  $P < 0.01$ . NS, not  
859 significant ( $P > 0.05$ ).  $P = 4.3 \times 10^{-3}$  for the left figure and  $P = 5.1 \times 10^{-3}$  for the right figure.

860 **D.** MFI of BrdU staining in mCherry<sup>lo</sup>CD80<sup>hi</sup> at Day 0.5 and mCherry<sup>hi</sup>CD80<sup>hi</sup> at Day 3.5 and

861 6.5. MFIs of other time points were difficult to evaluate because of very low cell numbers.  
862 Two-tailed Student's t-tests. \* P = 0.015 and \*\* P =  $6.5 \times 10^{-3}$ . NS, not significant (P > 0.05).  
863  
864 **Figure 6. Fate mapping study of proliferating Aire<sup>+</sup> mTECs in *in vitro* reaggregated thymic**  
865 **organ culture (RTOC)**  
866 **A.** RTOC experiment to test the differentiation capacity of proliferating Aire<sup>+</sup> mTECs.  
867 Proliferating Aire<sup>+</sup> mTECs (mCherry<sup>lo</sup>) and E15.5 embryonic thymic cells were re-aggregated  
868 and subsequently cultured for 5 days. Reaggregated thymic organ (RTO) was analyzed by flow  
869 cytometer. Representative flow cytometric profiles of RTOC are shown. N = 5. The ratio of  
870 mCherry<sup>hi</sup> cells in TECs is summarized in right figure. \*P < 0.05. P = 0.027 between CD80<sup>hi</sup> and  
871 CD80<sup>lo</sup> in mCherry<sup>lo</sup> and P = 0.024 between CD80<sup>hi</sup> mCherry<sup>lo</sup> and CD80<sup>hi</sup> RTOC control.  
872 **B.** Volcano plots of RNA-seq data from mCherry<sup>lo</sup> CD80<sup>hi</sup> mTECs (mCherry<sup>lo</sup>), mCherry<sup>hi</sup>  
873 CD80<sup>hi</sup> mTECs (mCherry<sup>hi</sup>), and mCherry<sup>hi</sup> CD80<sup>hi</sup> mTECs in RTOC (mCherry<sup>hi</sup> in RTOC).  
874 Red dots in volcano plots indicate genes for which expression differed significantly between the  
875 two subsets. Numbers of differentially expressed genes are shown in the panels. N = 3. Y axis is  
876 log<sub>10</sub> of FDR P-value.  
877 **C.** Expression levels of Aire and Mki67 in mCherry<sup>lo</sup>, mCherry<sup>hi</sup>, and mCherry<sup>hi</sup> in RTOC.  
878 **D.** Scatter plot of normalized expression values of TA-TEC marker candidates in mCherry<sup>lo</sup> and  
879 mCherry<sup>hi</sup> in RTOC. TA-TEC marker candidate genes were selected from bulk RNA-seq data  
880 and scRNA-seq data in Supplementary Figure 7.  
881 **E.** Integration of well-based scRamDA-seq data (mCherry<sup>lo</sup>, mCherry<sup>hi</sup>, and mCherry<sup>hi</sup> in  
882 RTOC) with the droplet-based scRNA-seq data in Figure 2.  
883 **F.** Frequency of each cell cluster in scRamDA-seq data of mCherry<sup>lo</sup>, mCherry<sup>hi</sup>, and mCherry<sup>hi</sup>  
884 -RTOC.  
885 **G.** Volcano plot of TSA expression in each cell cluster in scRamDa-seq data of  
886 mCherry<sup>hi</sup>-RTOC as compared to mCherry<sup>lo</sup>. Red dots indicate significantly changed TSA  
887 genes.  
888  
889 **Figure 7. Proliferating Aire<sup>+</sup> CD80<sup>hi</sup> mTECs persist in older mice**  
890 **A.** Flow cytometry analysis of CD80<sup>hi</sup> mTEC subsets from Fucci2a mice aged 4, 8, and 19  
891 weeks. Representative data are shown. Percentages of Venus<sup>+</sup> cells in CD80<sup>hi</sup> mTEC subsets are  
892 summarized in the graph in the right panel. N = 4 each for Aire<sup>gfp/+</sup>::Fucci2a (circle) and  
893 control::Fucci2a (closed triangles)



894 **B.** Schematic depiction of the proposed process of Aire<sup>+</sup> mTEC development in the adult  
895 thymus. Transit-amplifying TSA<sup>lo</sup> Aire<sup>+</sup> TECs give rise to mature mTECs. Precursor cells to the  
896 transit-amplifying TECs have not been determined yet. Cluster numbers in Figure 1 are shown  
897 together with the model of mTEC subsets I to IV.  
898

Figure 1

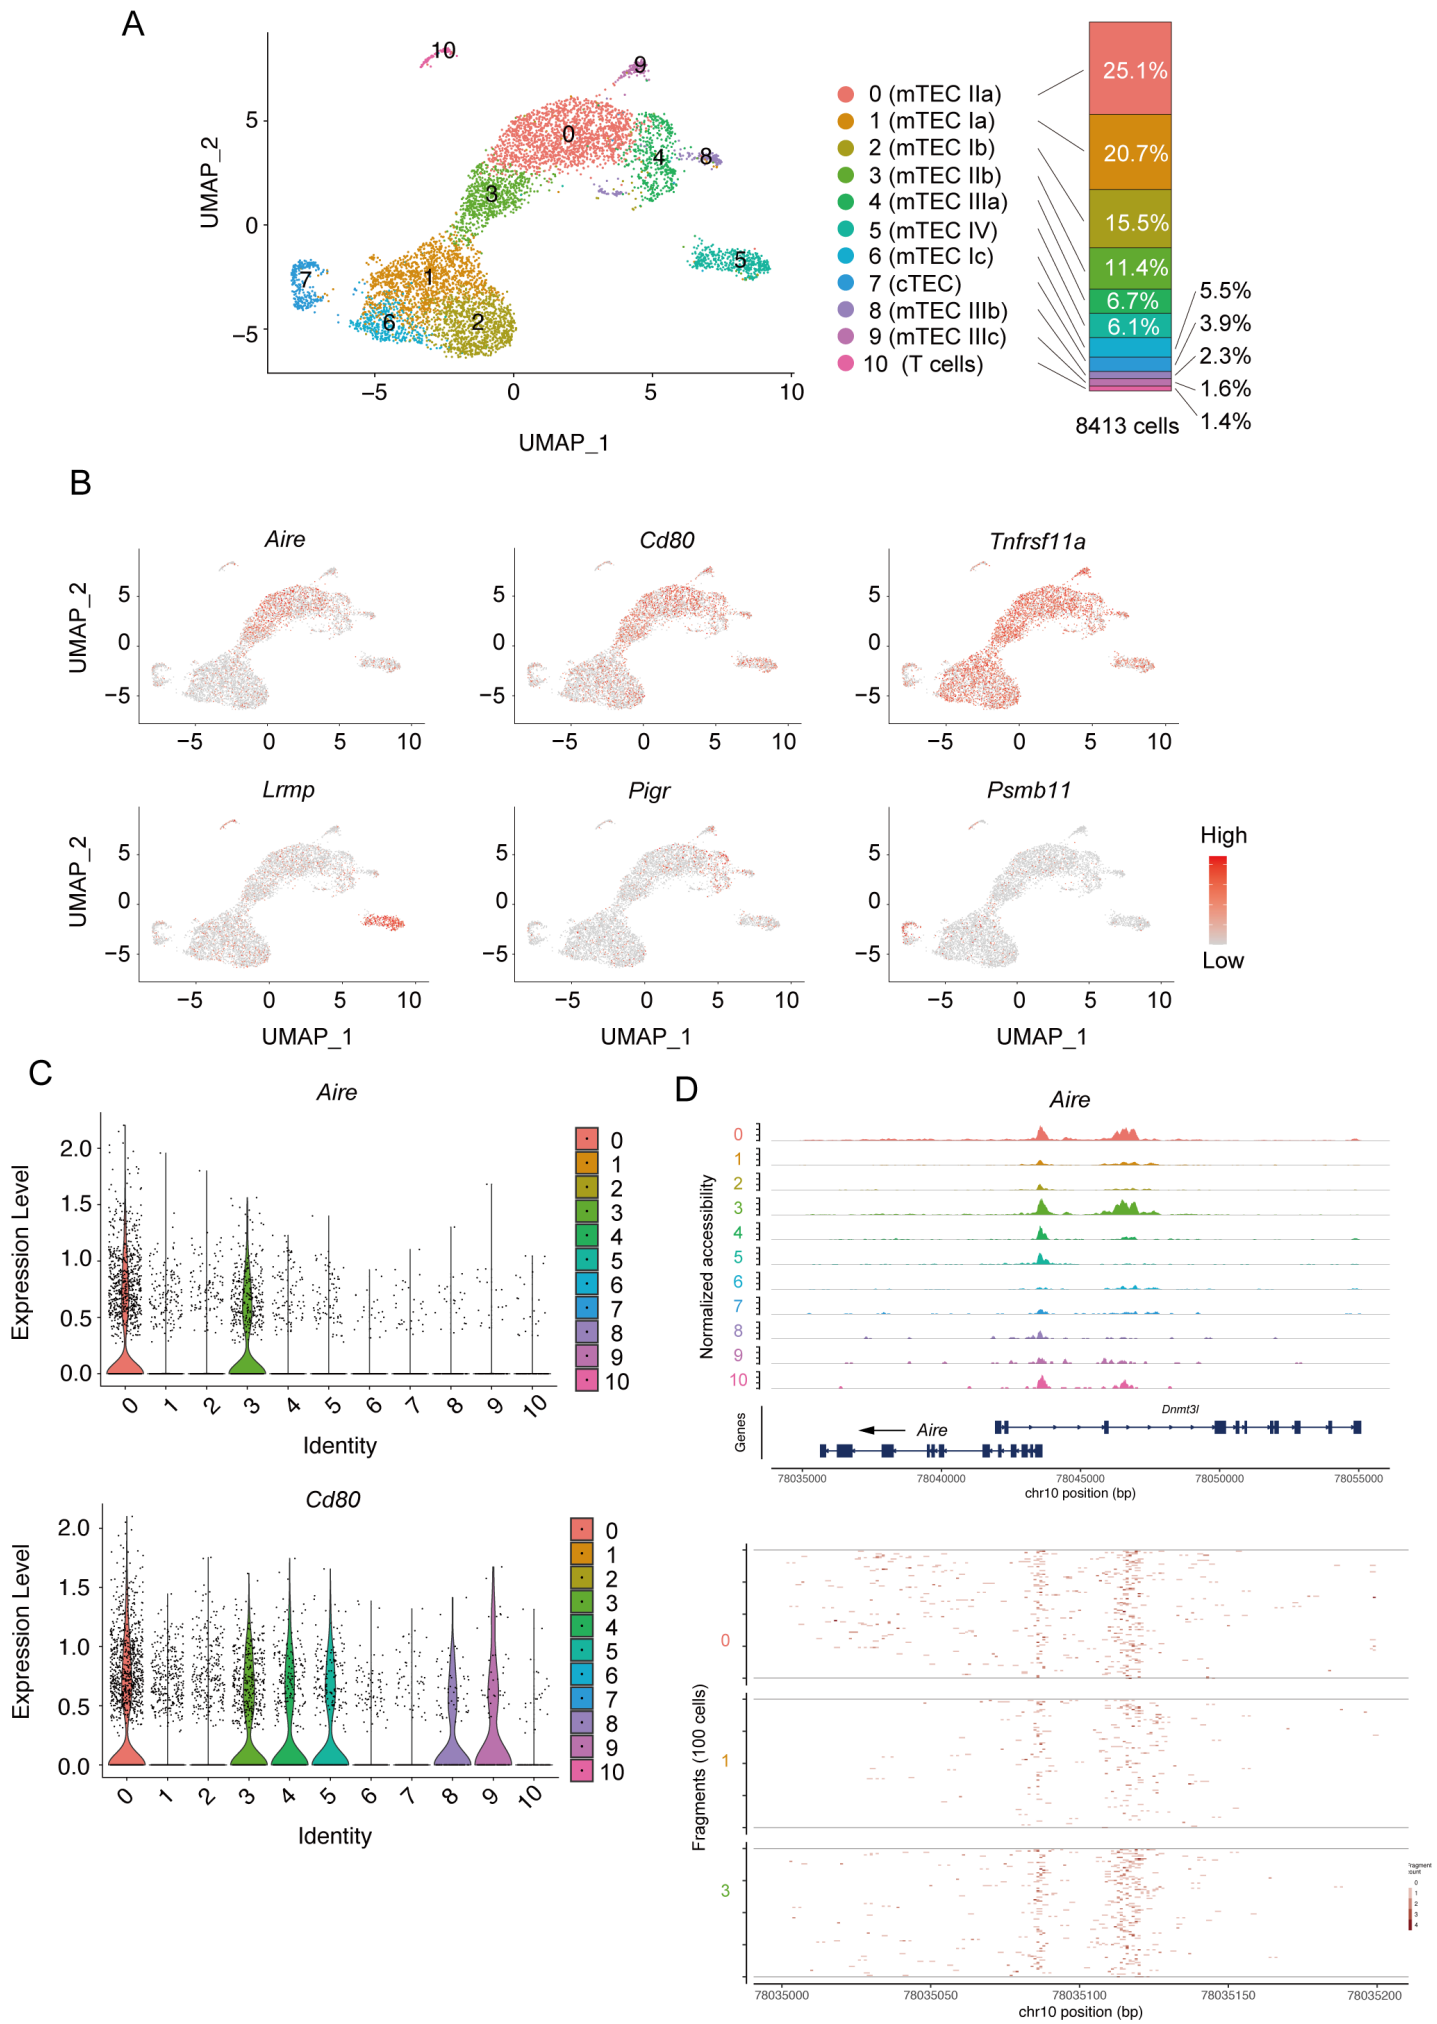

Figure 2

A

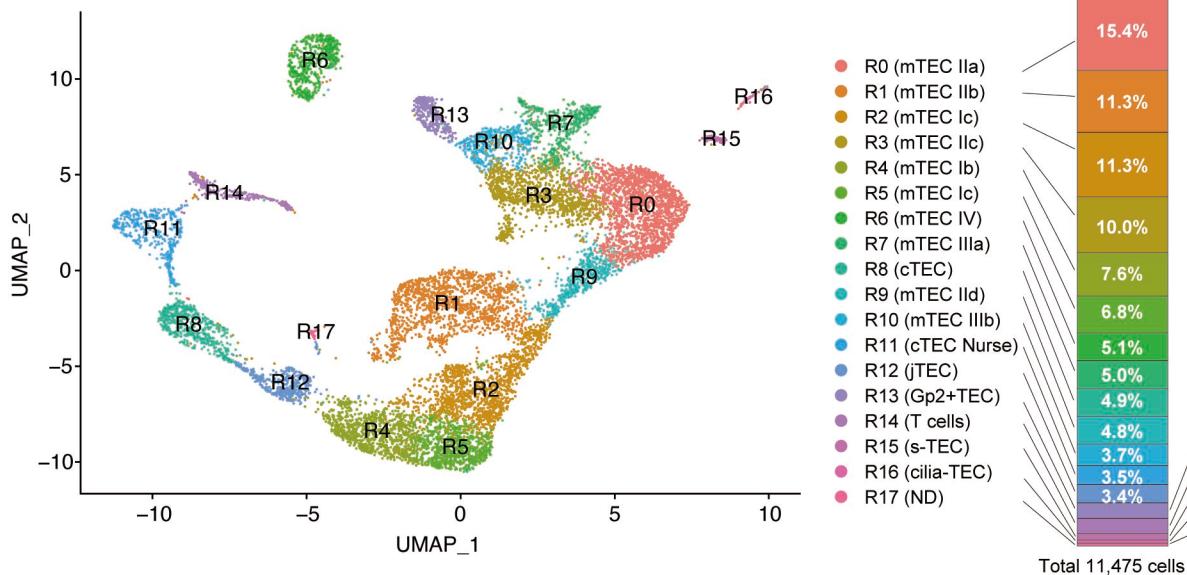

B

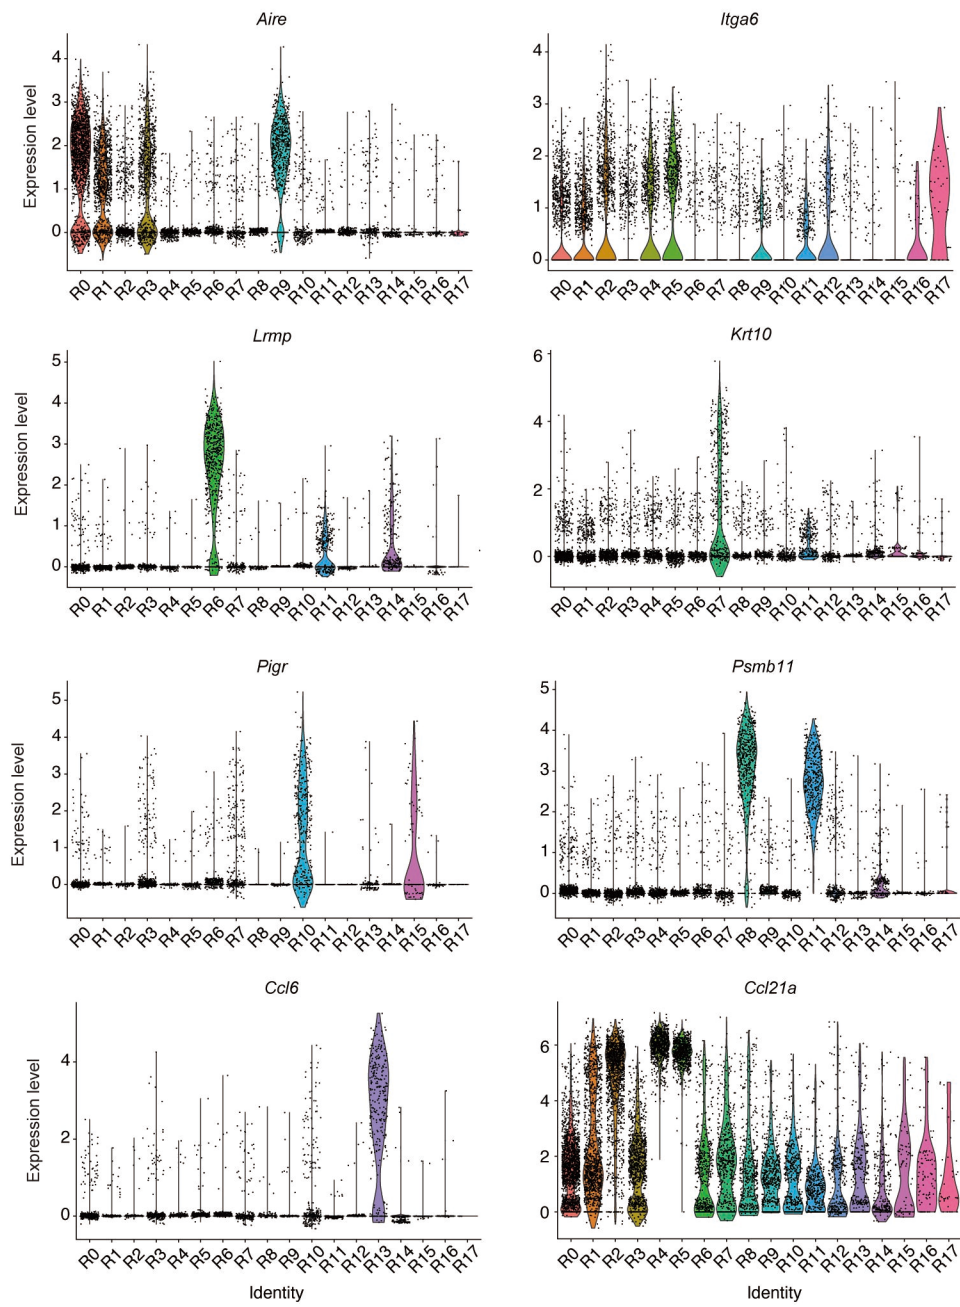

Figure 3

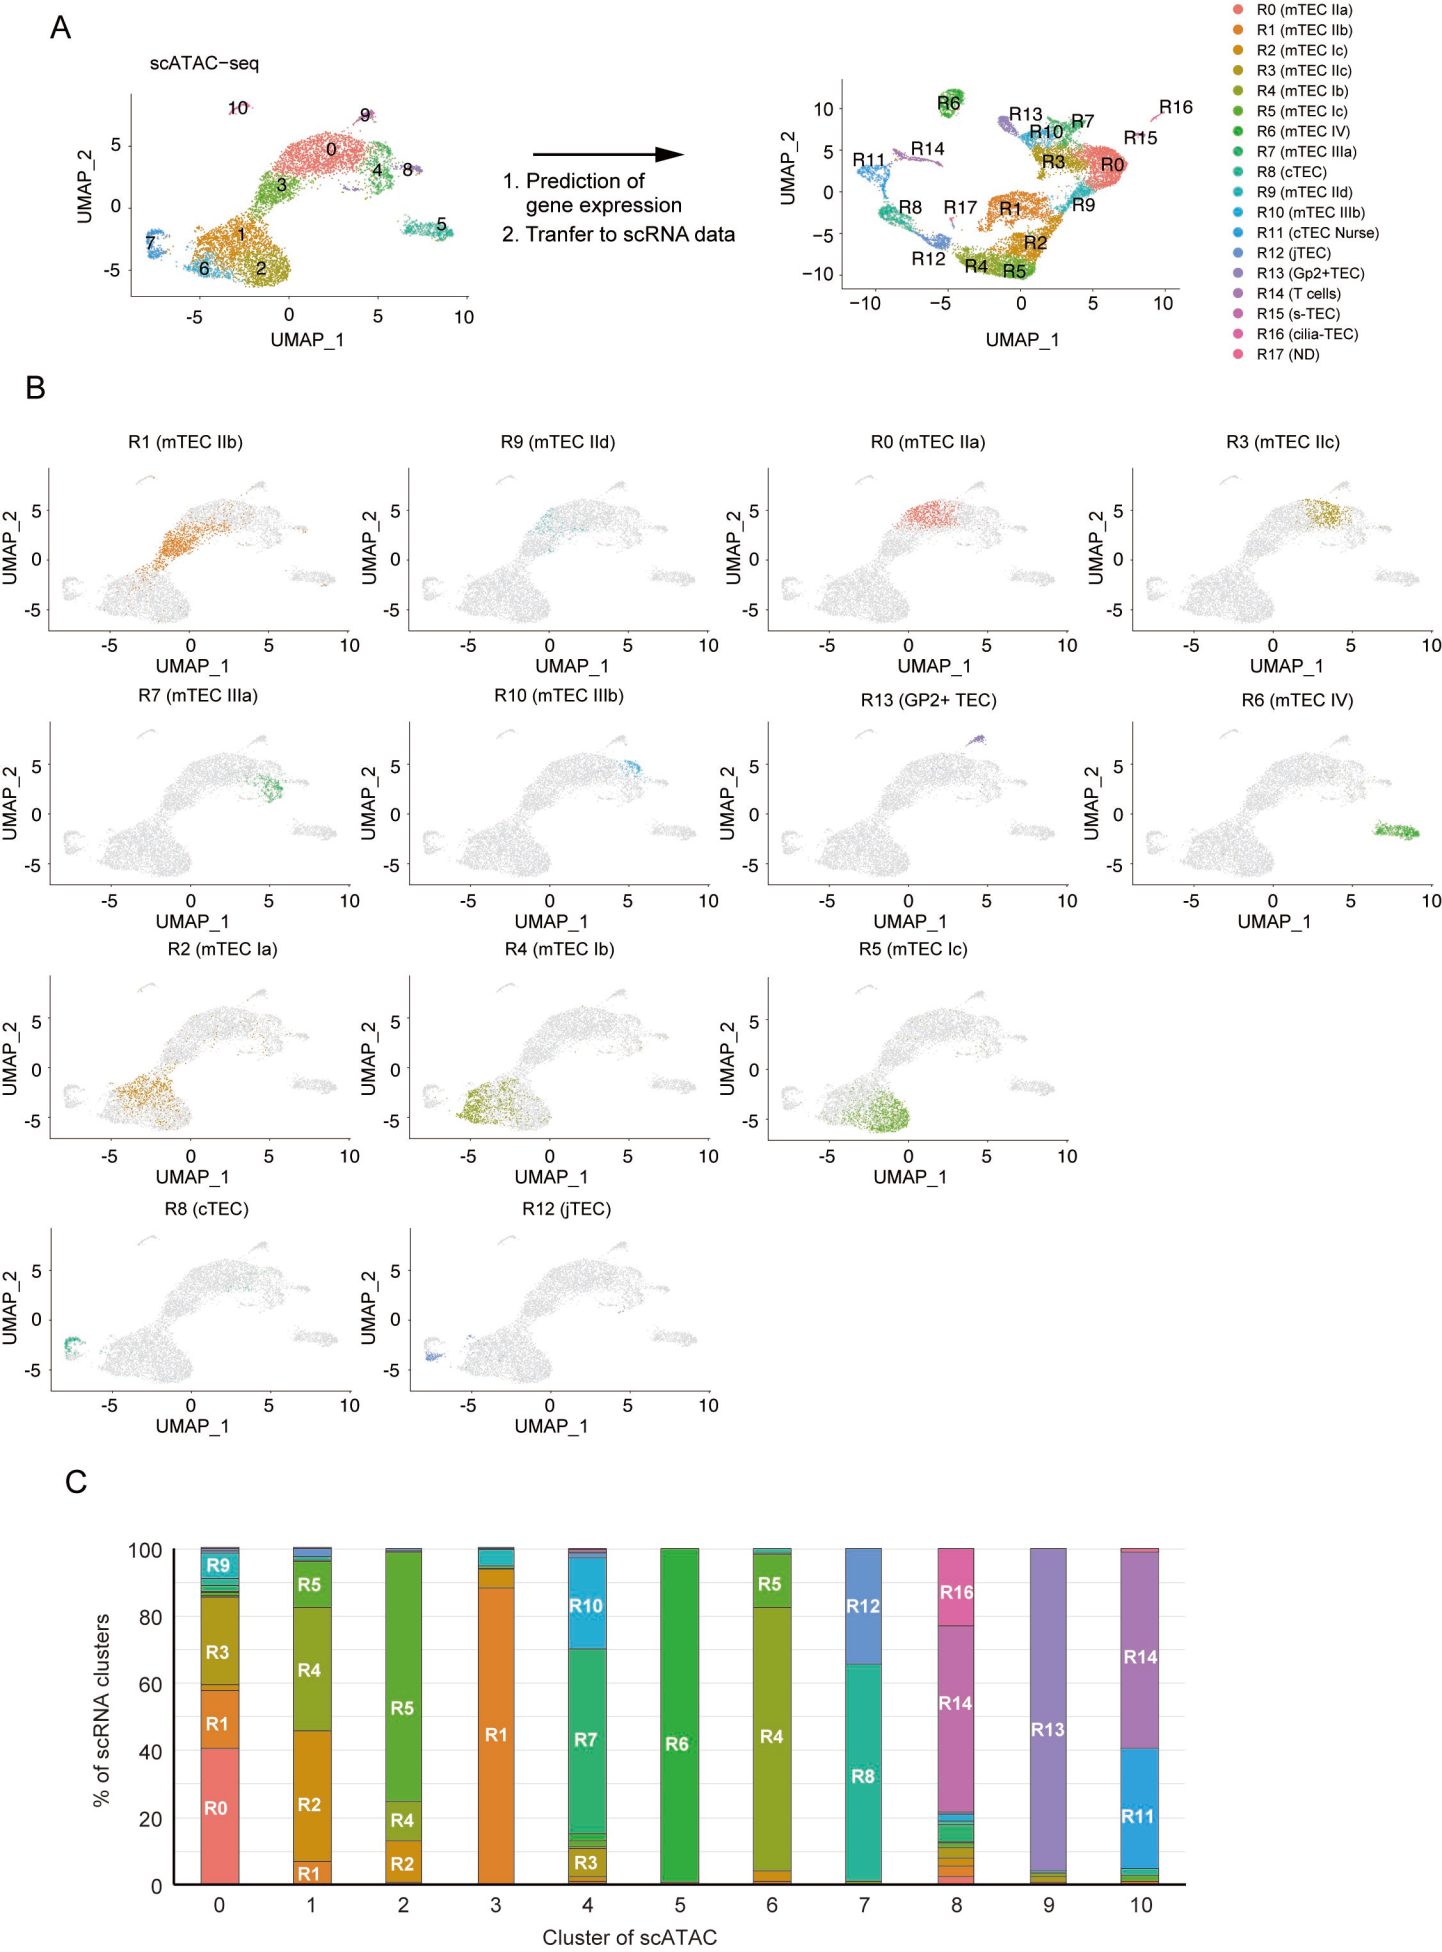



Figure 4

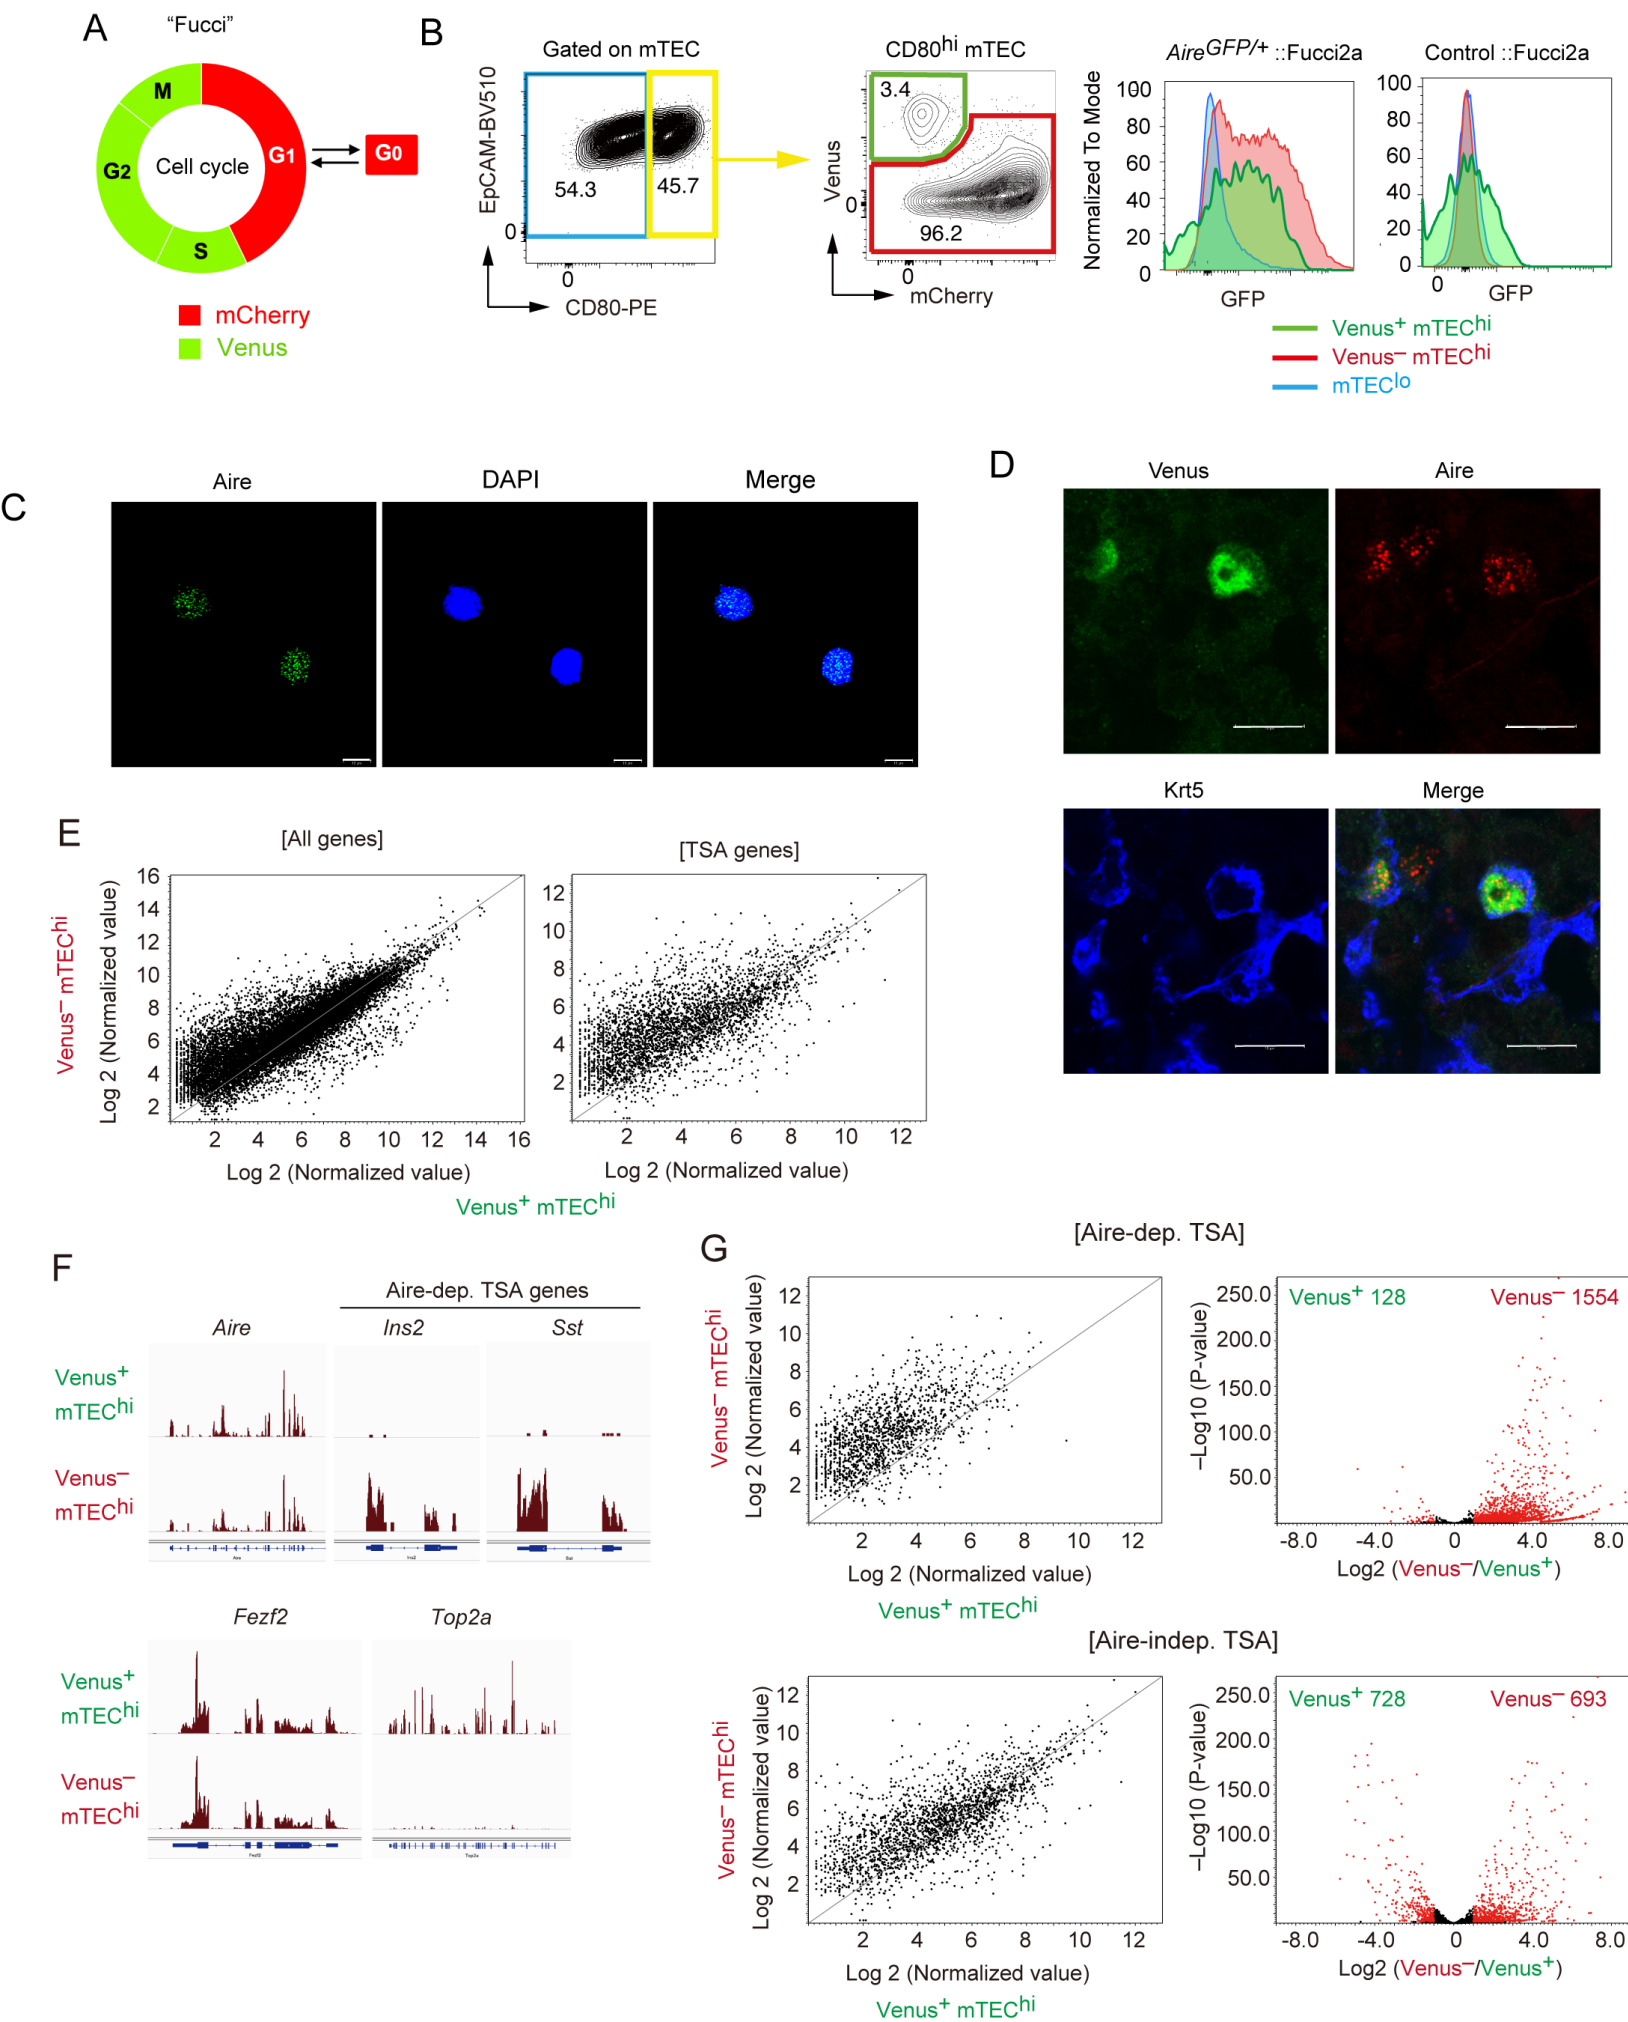

Figure 5

A

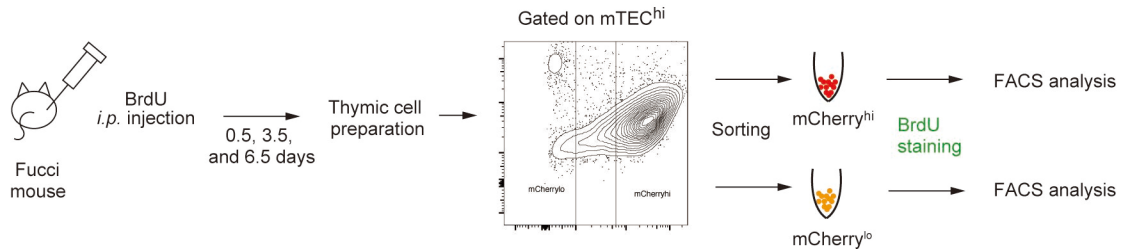

B

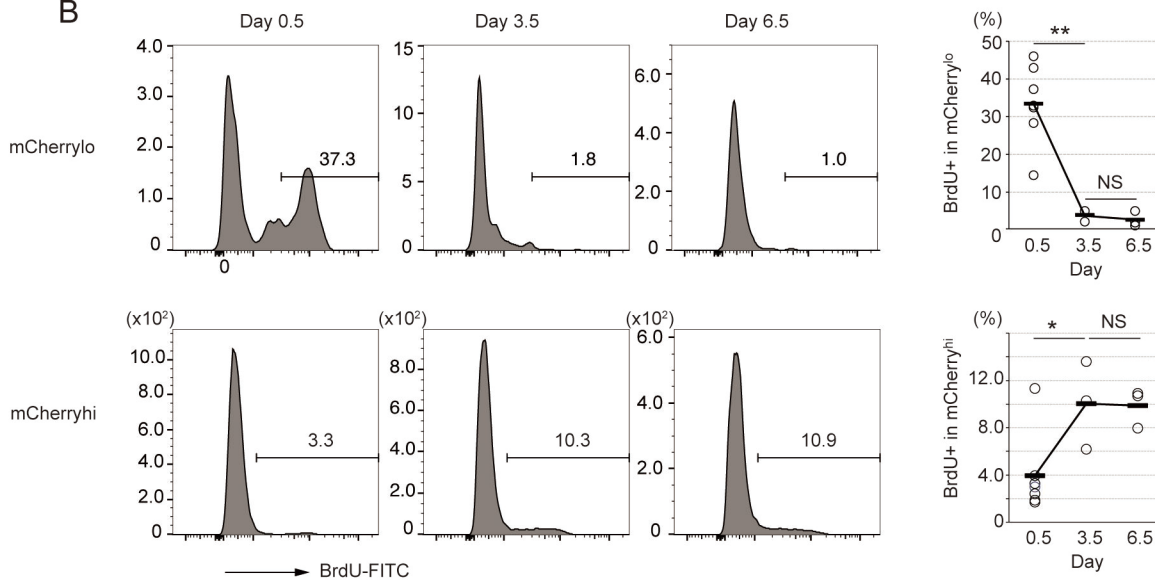

C

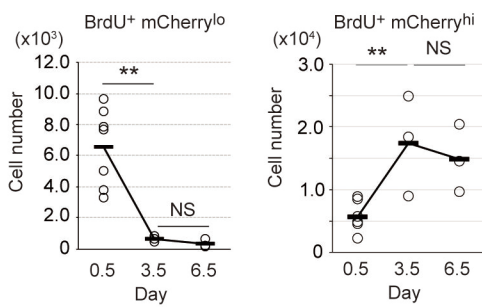

D

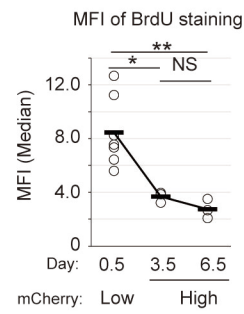

**Figure 6**

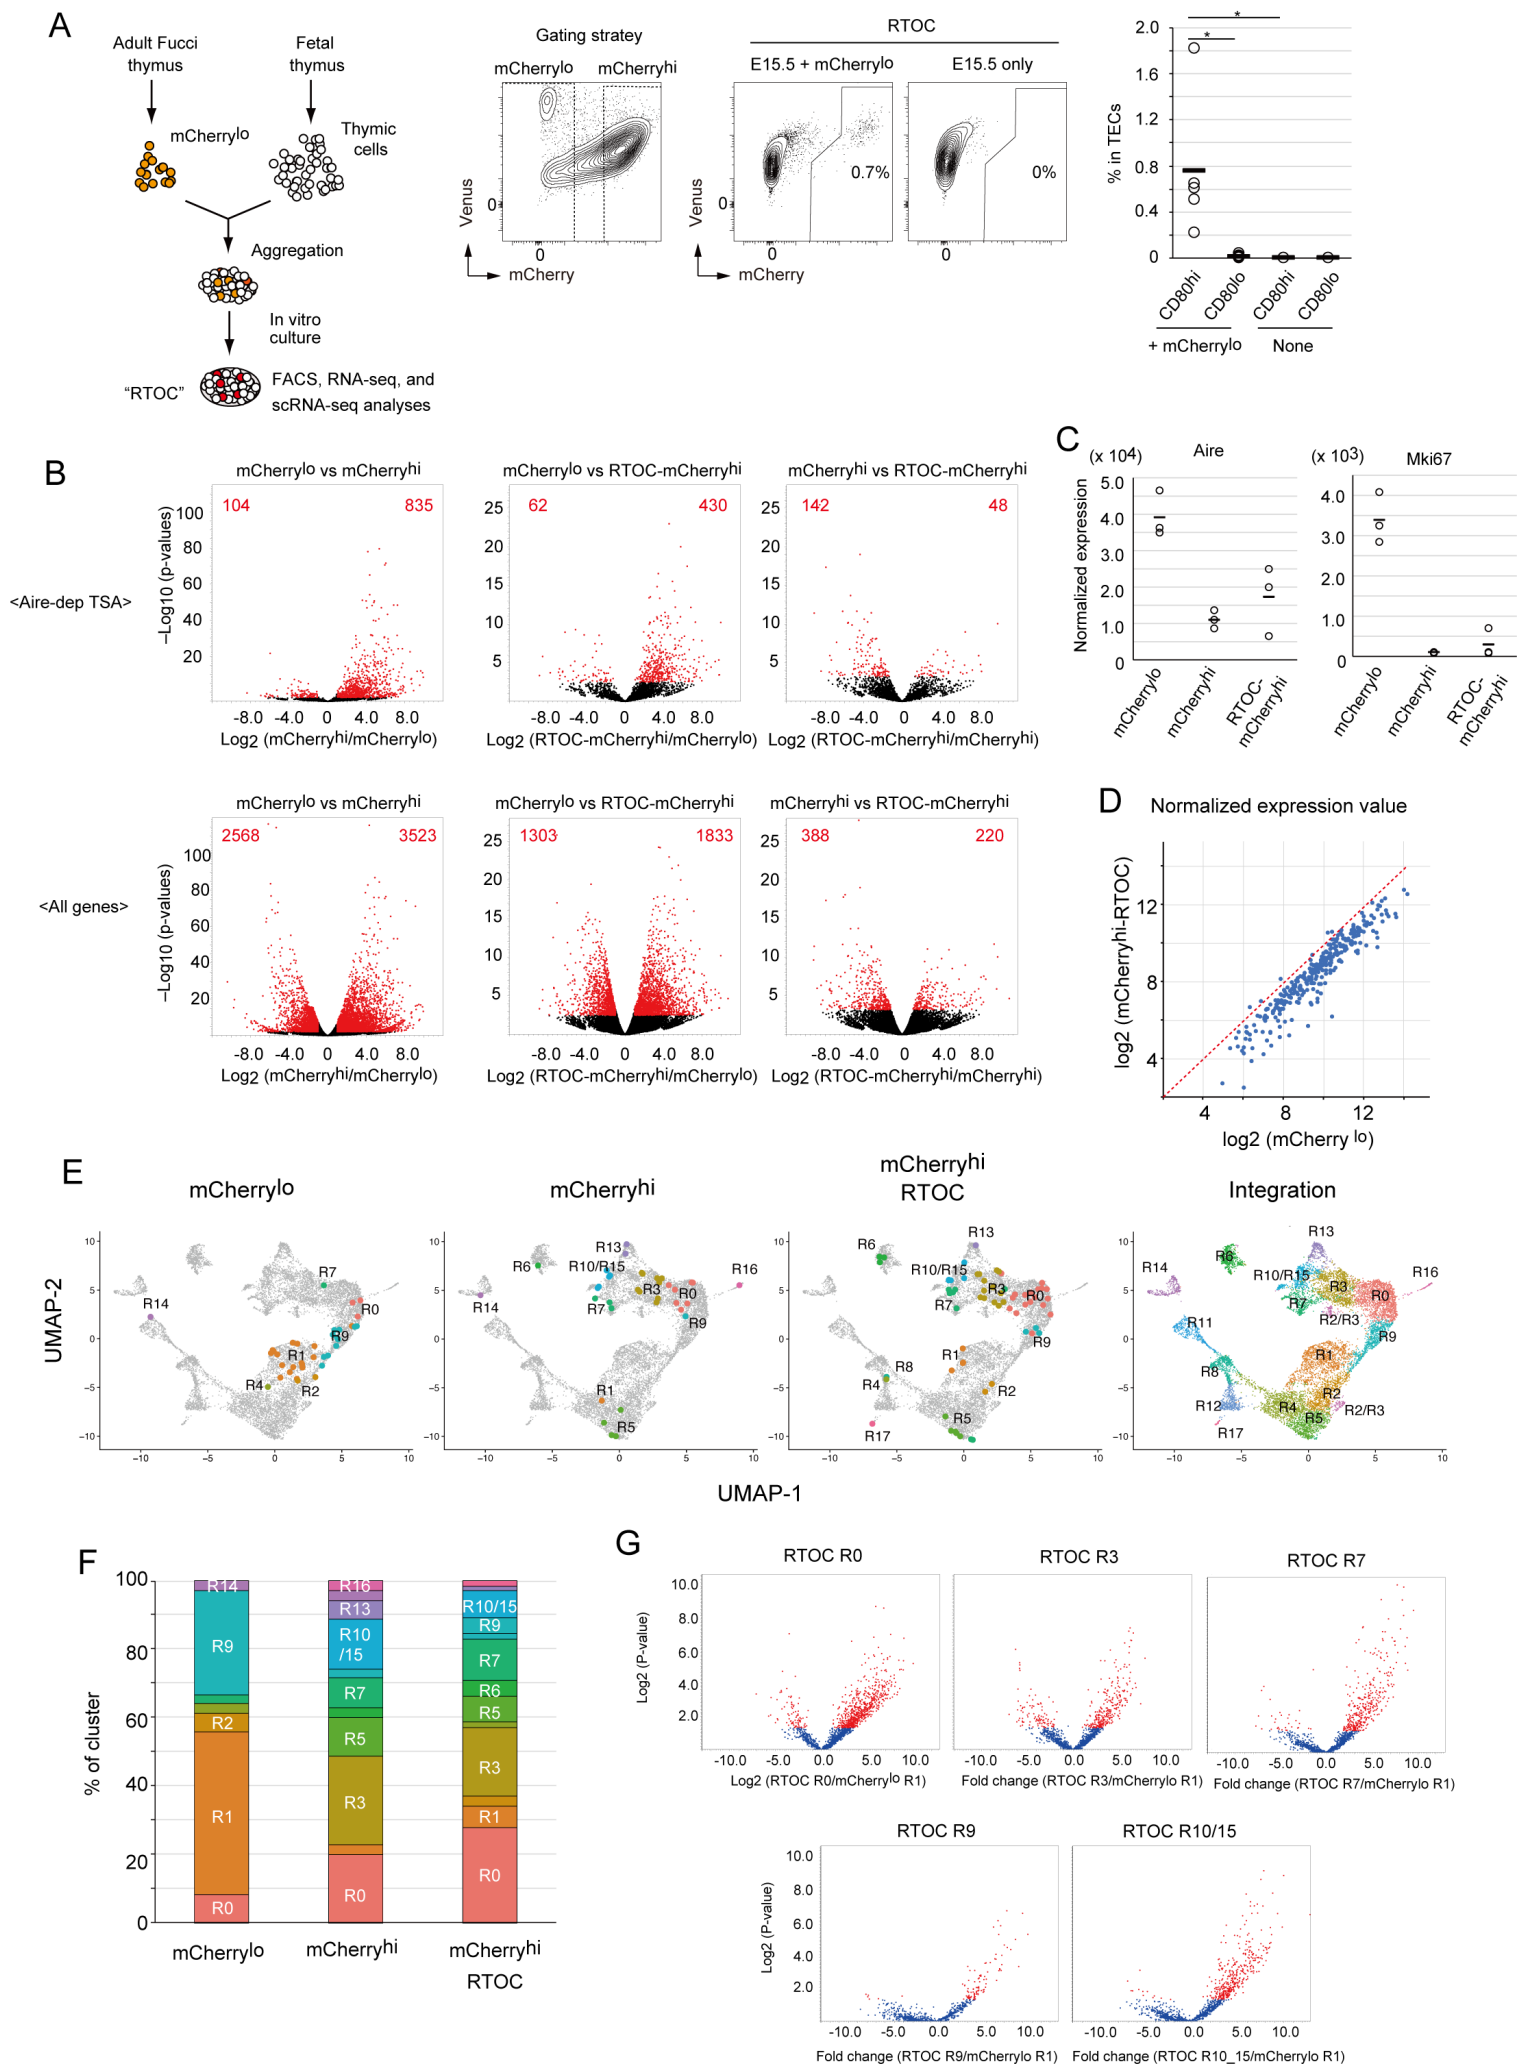



Figure 7

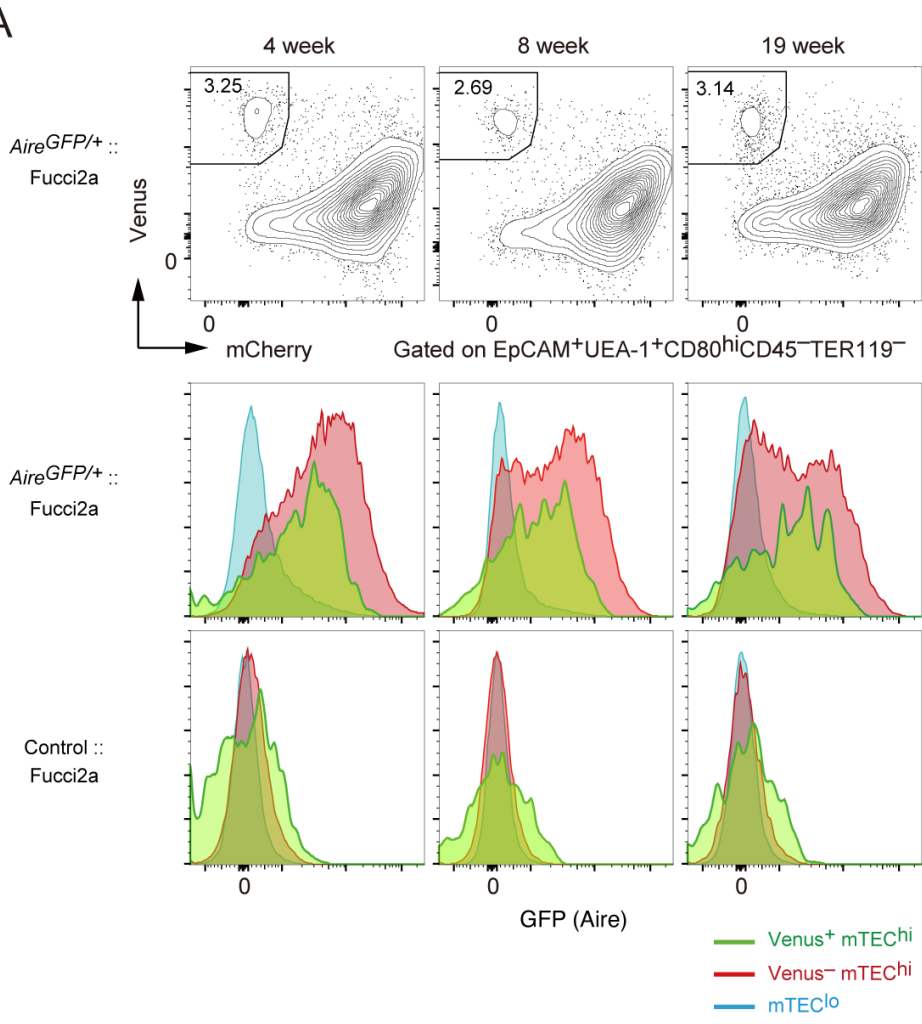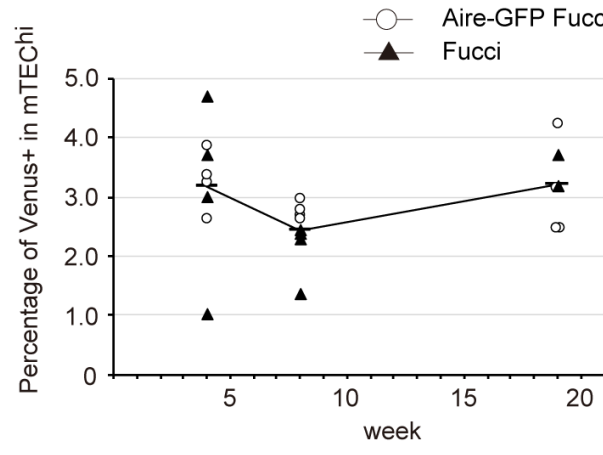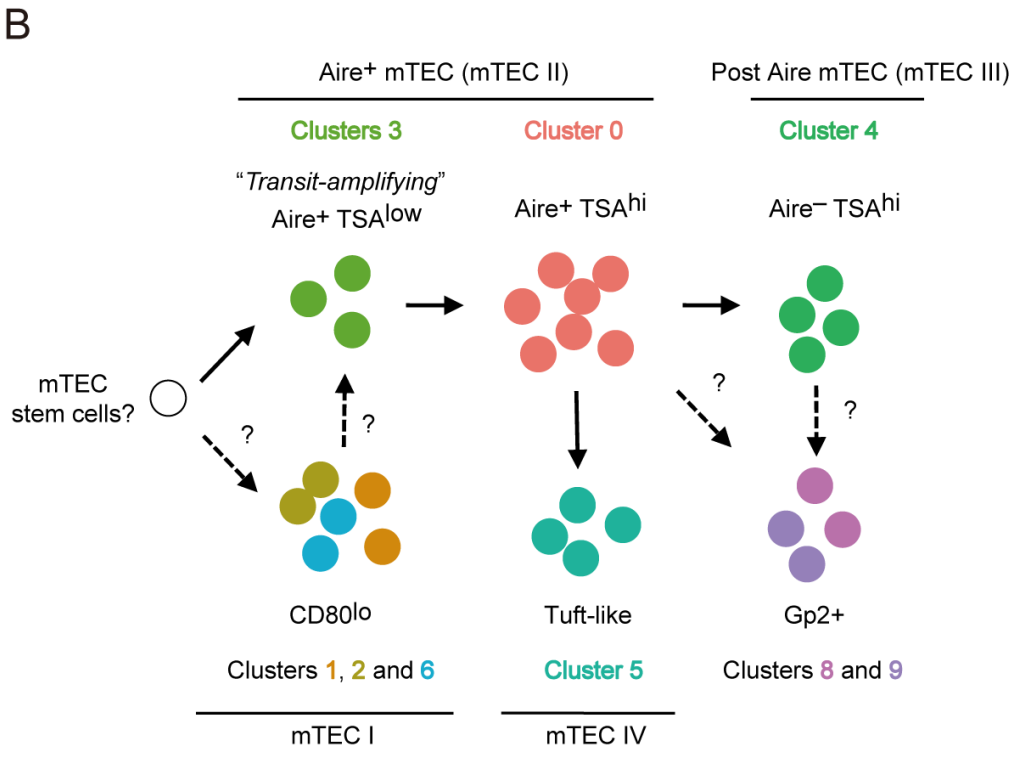

Figure 1-figure supplement 1

A

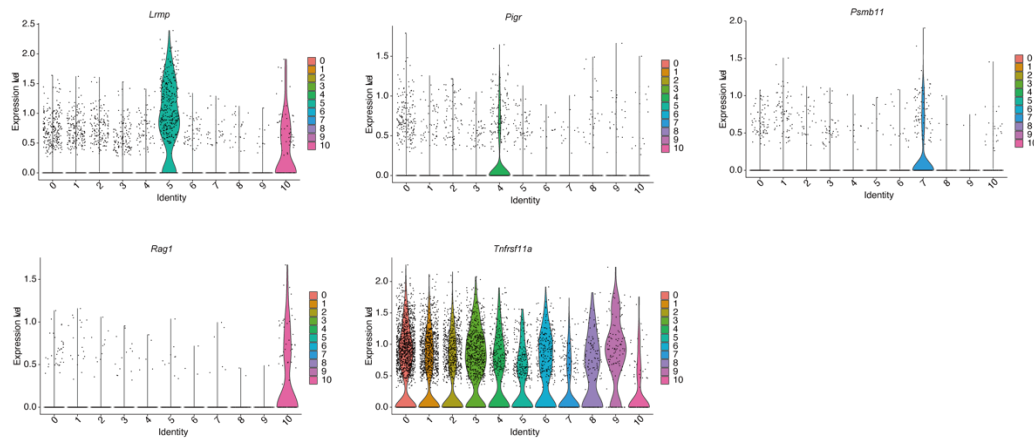

B

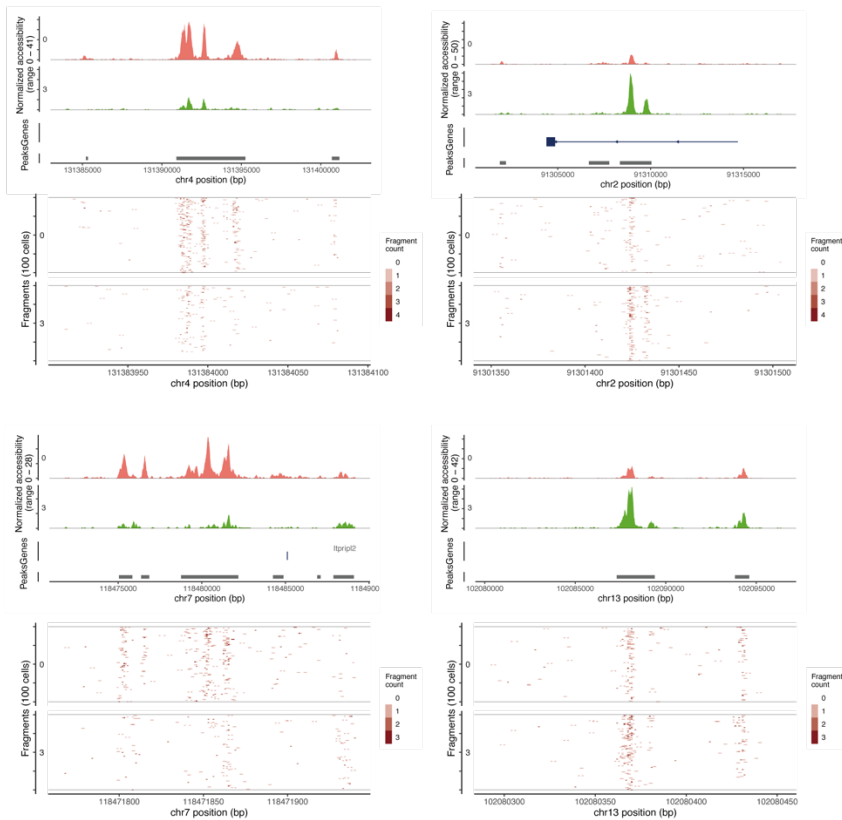

**Figure 1-figure supplement 1.**

**A.** Violin plot of chromatin accessibility in TEC marker gene regions in each cluster.

**B.** Pseudo-bulk accessibility tracks and frequency of sequenced fragments. Typical differentially accessible regions between clusters 0 and 3 are depicted from Supplementary Table 1.

Figure 2-figure supplement 1

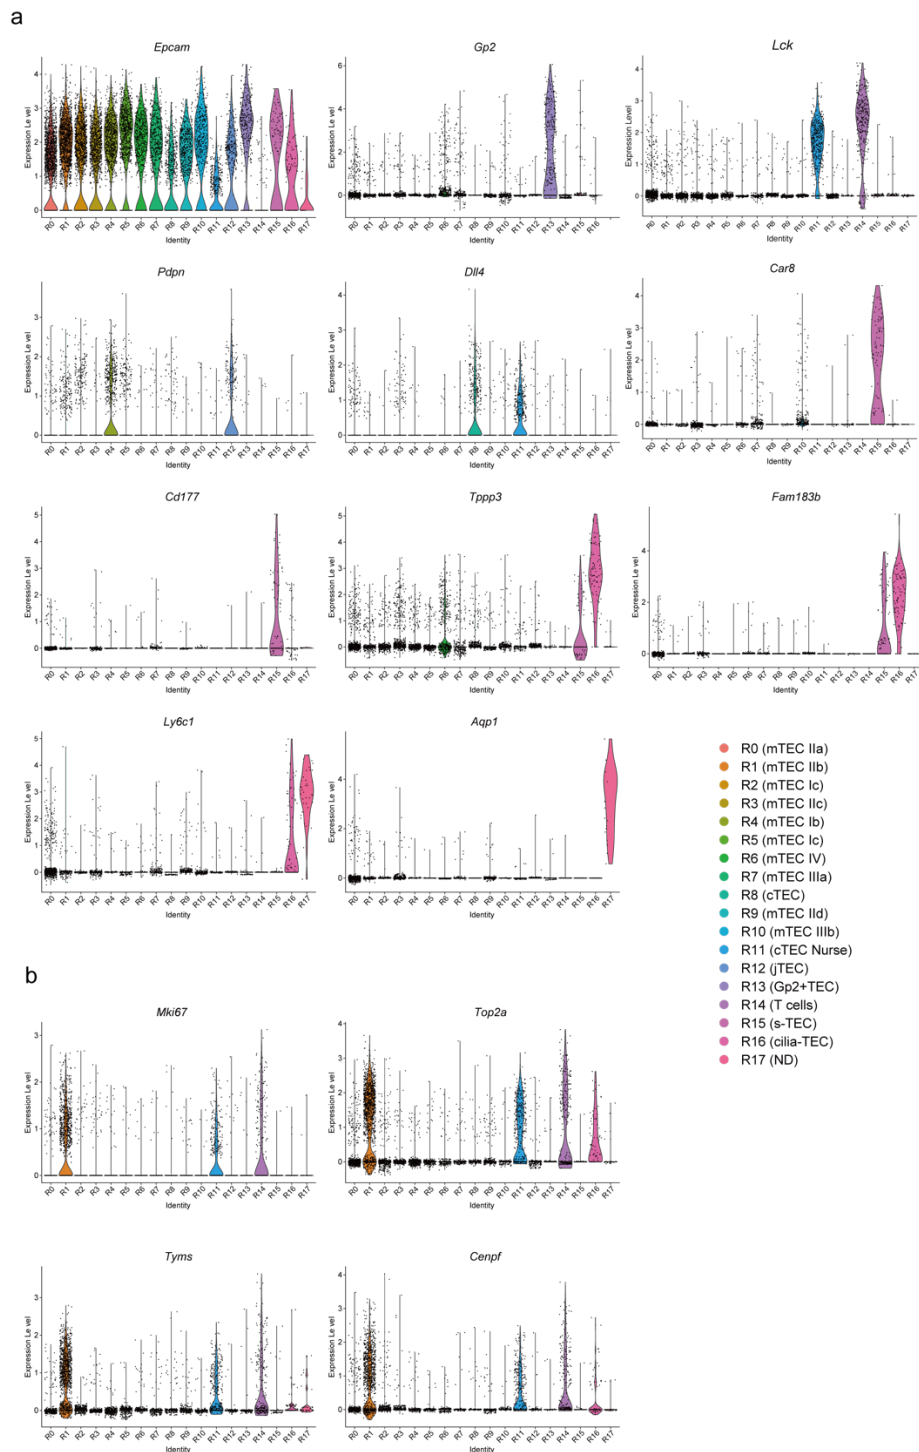

**Figure 2-figure supplement 1.**

**A.** Violin plots for expression level of typical TEC marker genes in scRNA-seq analysis of TECs

**B.** Violin plots for expression level of cell-cycle-related genes in scRNA-seq analysis of TECs

Figure 2-figure supplement 2

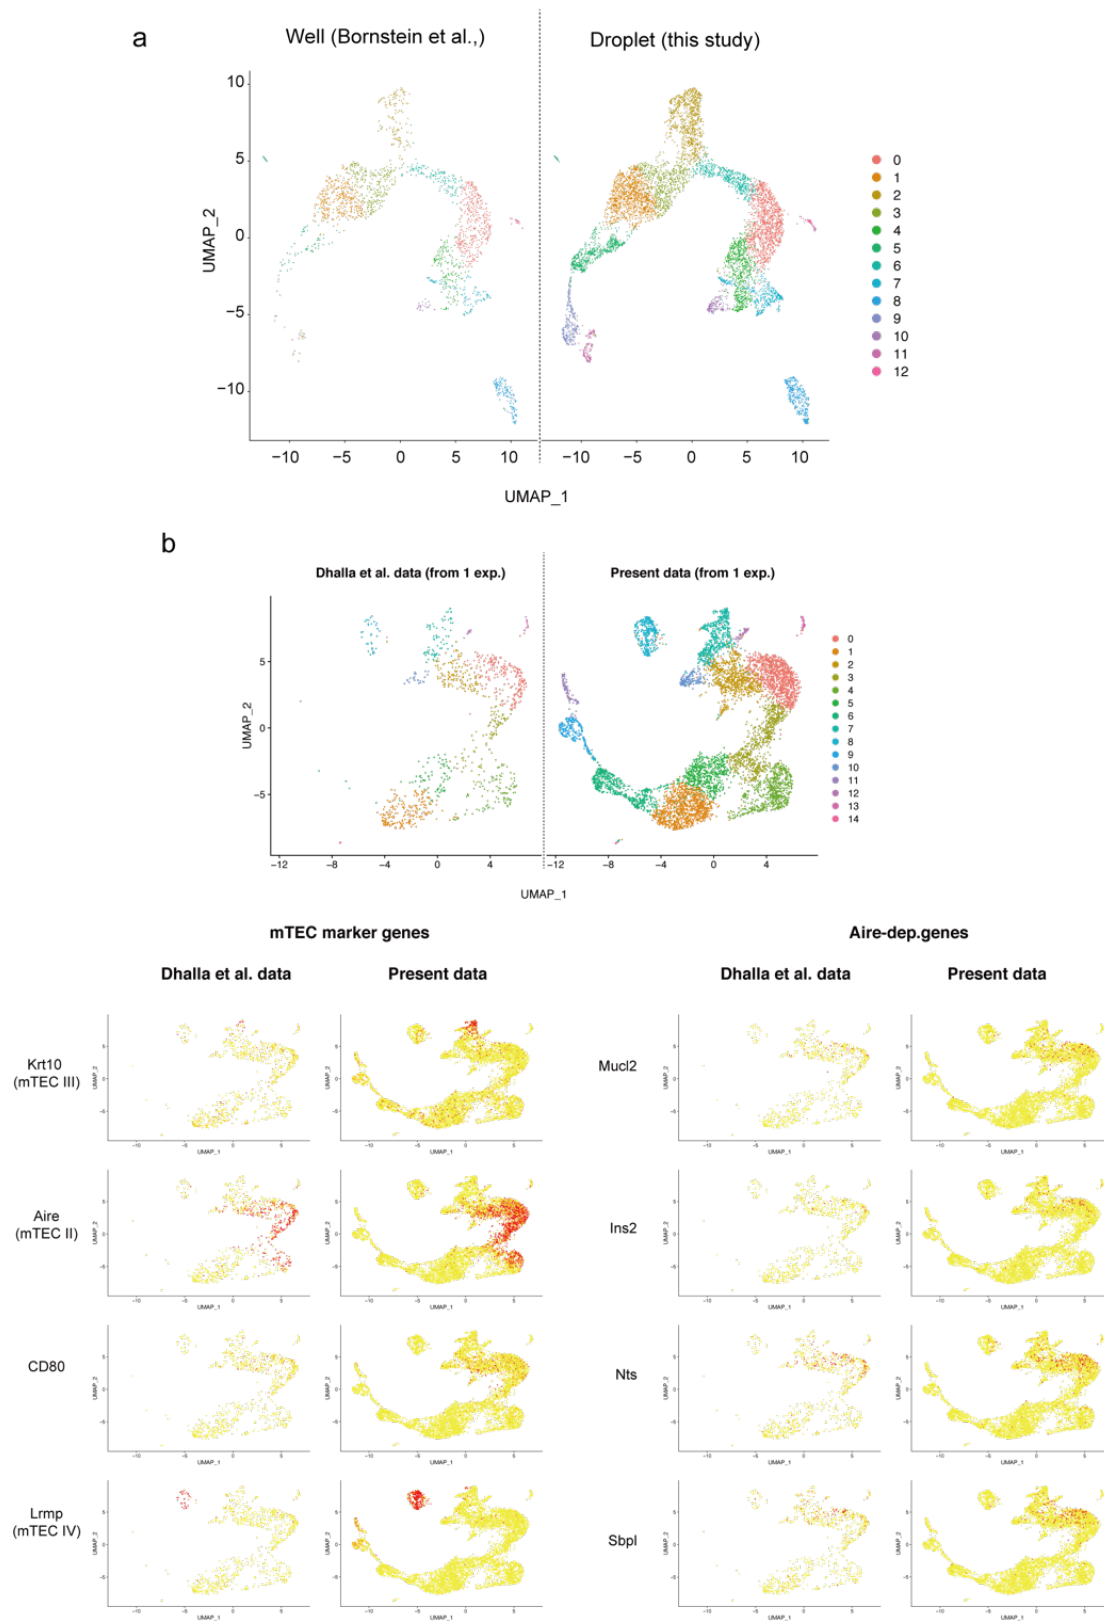

## Figure 2-figure supplement 2

**A.** Integration of scRNA-seq data derived from a previously reported well-based study<sup>1</sup> and scRNA-seq data derived from the present droplet-based study. scRNA-seq data from the two studies were integrated

**B.** UMAP projections of the two scRNA-seq datasets are shown. Data from a previous study<sup>2</sup> were re-analyzed and integrated with data from the present study. Expression of typical marker genes in each data.

1. Bornstein, C. *et al.* Single-cell mapping of the thymic stroma identifies IL-25-producing tuft epithelial cells. *Nature* **559**, 622-626 (2018).
2. Dhalla, F. *et al.* Biologically indeterminate yet ordered promiscuous gene expression in single medullary thymic epithelial cells. *EMBO J* **39**, e101828 (2020).

Figure 2-figure supplement 3

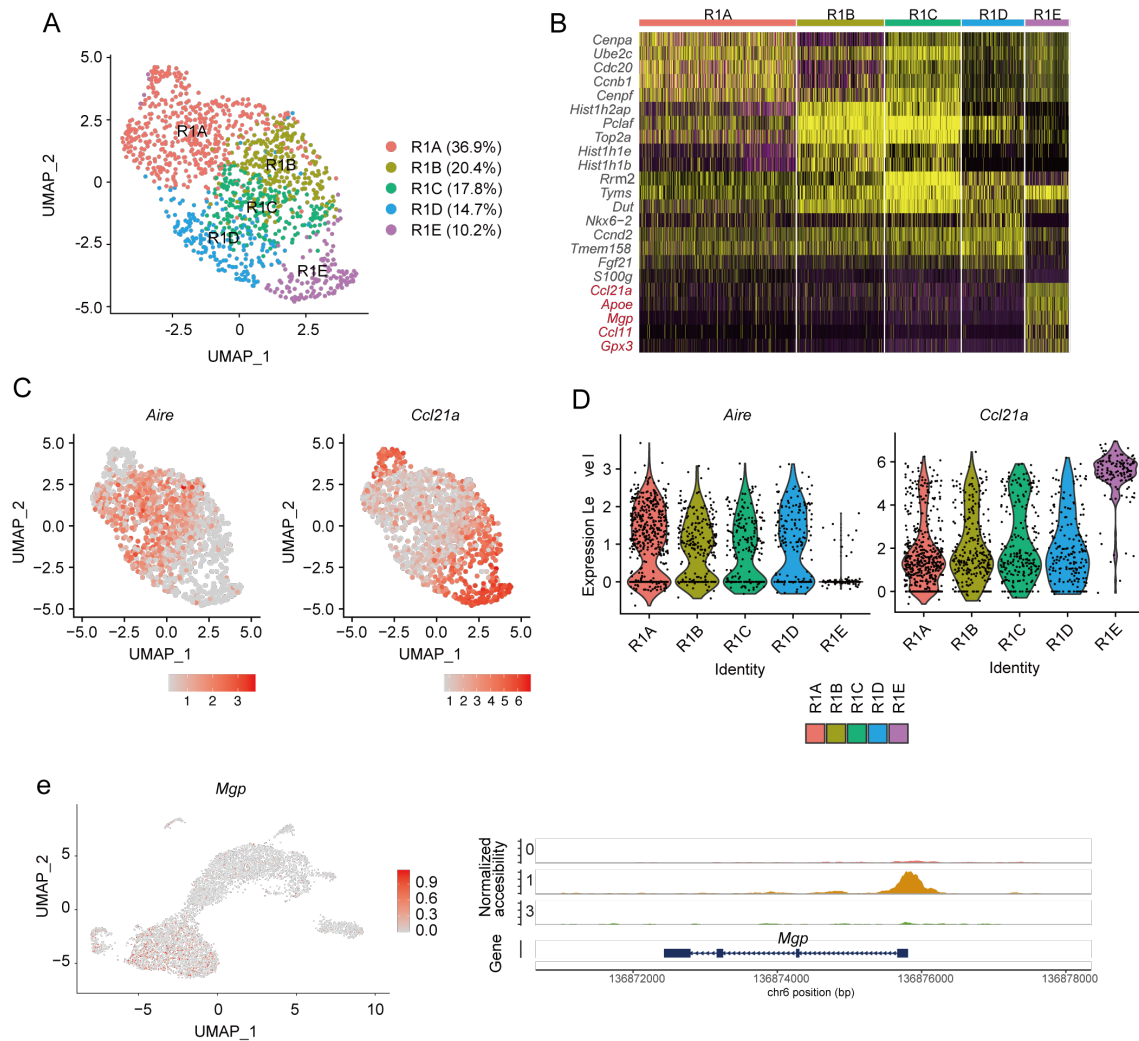

Figure 2-figure supplement 3

Sub-cluster analysis of the TEC subset expressing a high level of cell-cycle-related genes.

**A.** UMAP plot of scRNA-seq data and the percentage of each cluster (R1A to R1E) in R1.

**B.** Heatmap of the top 5 genes selectively expressed in each cluster. Yellow color indicates high expression.

**C.** Expression levels of *Aire* and *Ccl21a* in the sub-cluster is shown in dot plots.

**D.** Expression levels of *Aire* and *Ccl21a* in the sub-cluster is exhibited as violin plots.

**E.** Chromatin accessibility of a typical marker gene for sub-cluster R1E (*Mgp*). Accessibility in *Mgp* gene regions is represented in red (left). Pseudo-bulk accessibility tracks for *Mgp* in cluster 0, 1 and 3 is exhibited (bottom)

Figure 3-figure supplement 1

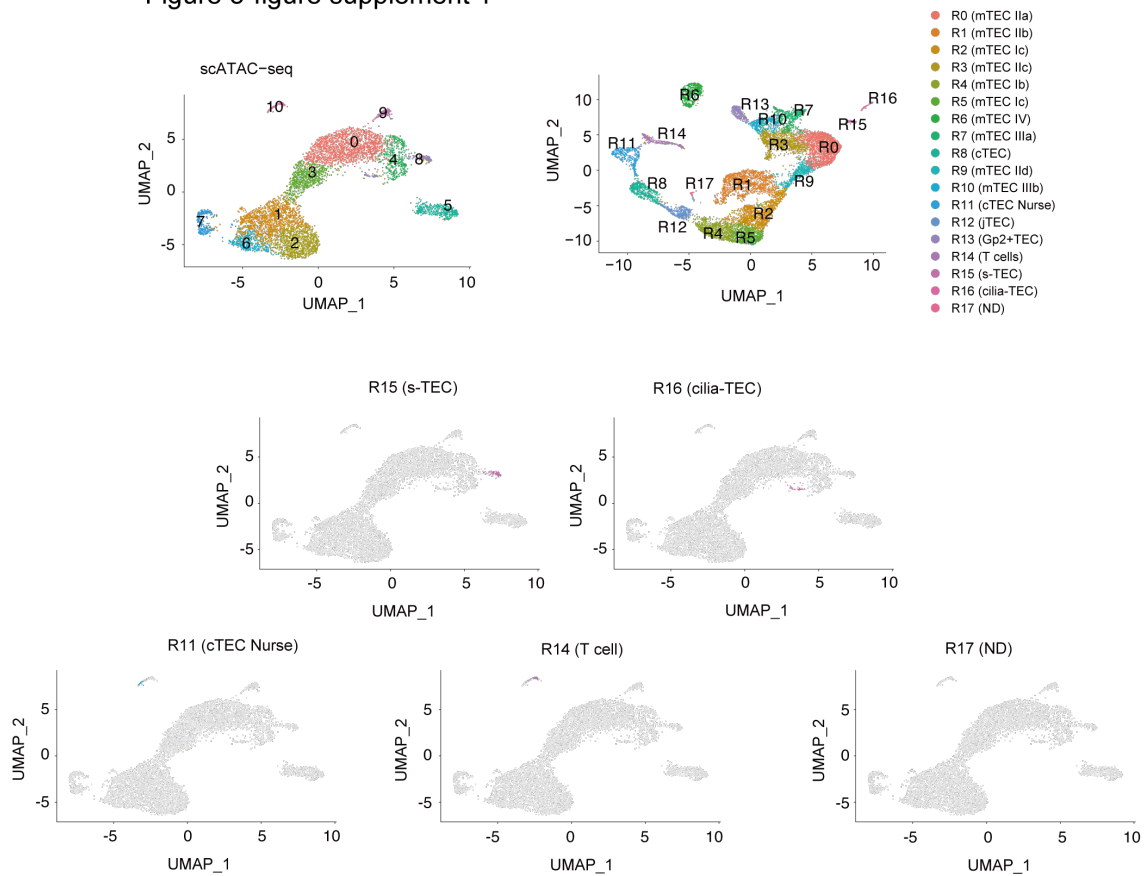

Figure 3-figure supplement 1

Integrative analysis of scATAC-seq data and scRNA-seq data of TECs. Gene expression was predicted from individual cells in scATAC-seq data (clusters 9 and 10). Individual cells in the scATAC-data were assigned to a scRNA-seq cluster (R0 to R17).



Figure 3-figure supplement 2

A

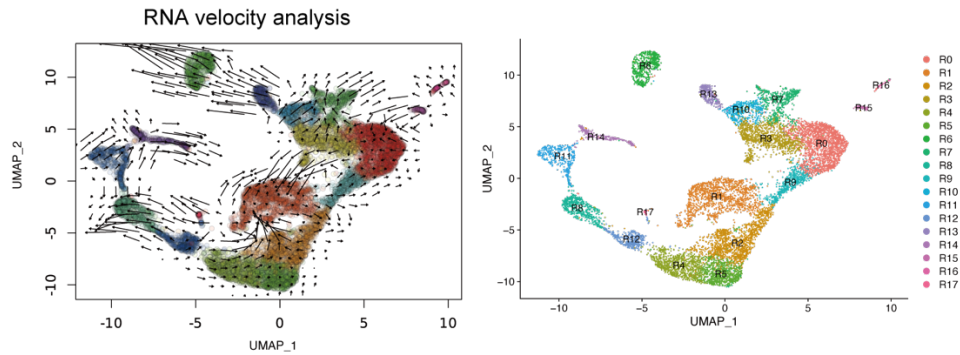

B

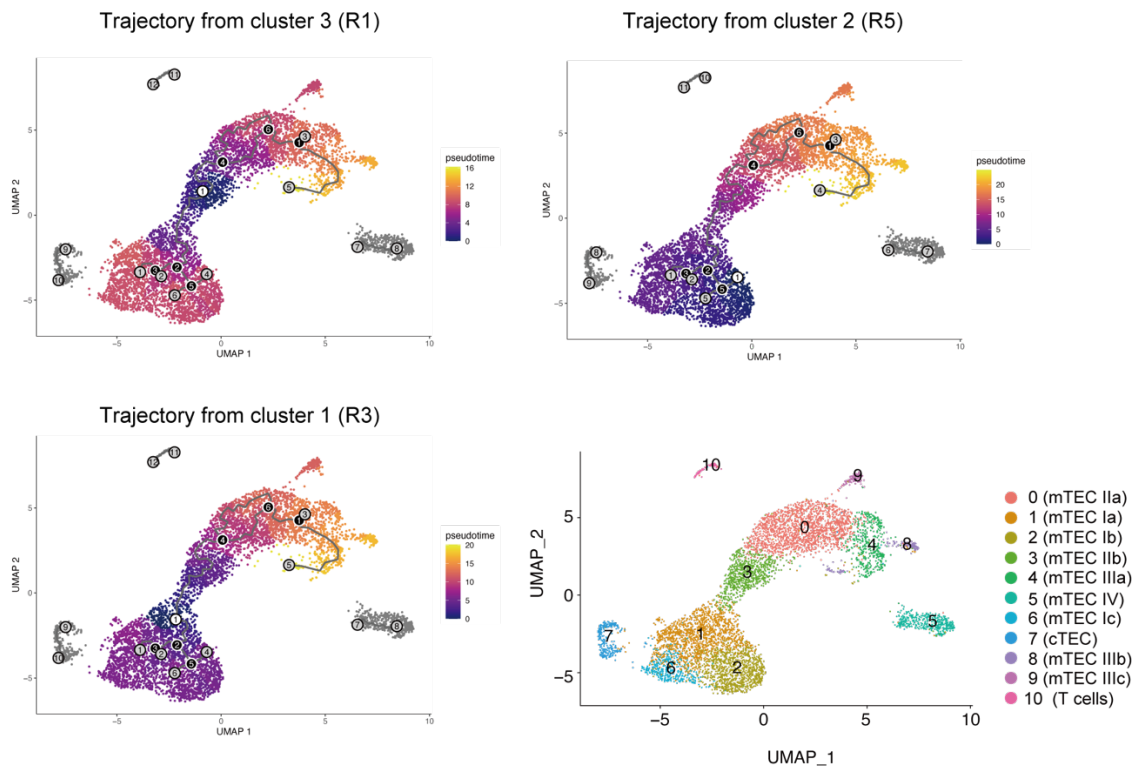

Figure 3-figure supplement 2

A. RNA velocity analysis of scRNA-seq data.

B. Monocle 3 trajectory analysis of scATAC-seq data. The trajectory was manually started from cluster 3, 2 or 1.

Figure 4-figure supplement 1

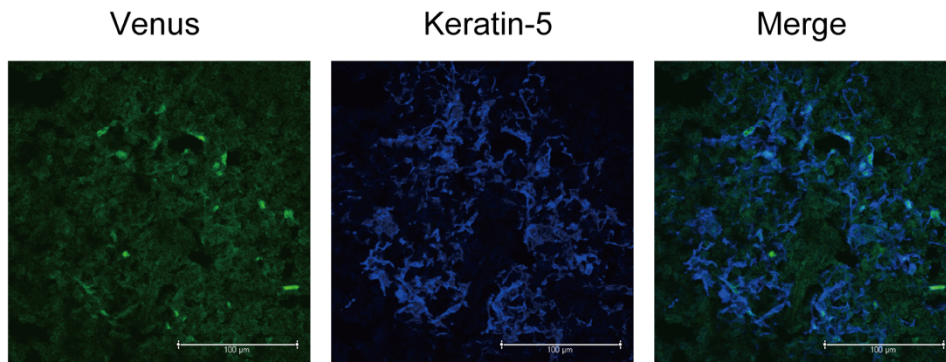

**Figure 4-figure supplement 1**

Immunostaining of thymic sections from Fucci2a mice with anti-GFP (for Venus staining, green) and anti-keratin-5 (Krt5, blue) antibodies. Typical panels of 3-independent experiments are exhibited. Scale bars, 100 µm.

Figure\_6-figure supplement 1

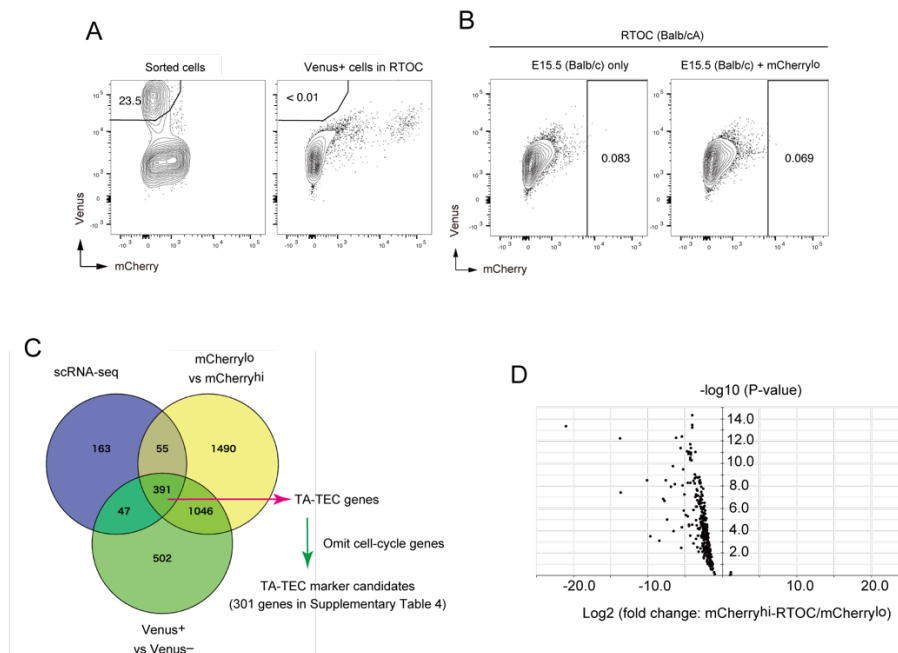

Figure 6-figure supplement 1

**A.** Ratio of Venus<sup>+</sup> cells in sorted mCherry<sup>lo</sup> and RTOC

**B.** Flow cytometric analysis of RTOC using allogenic fetal thymus (Balb/cA)

**C.** Venn diagram of gene lists expressed in proliferating TECs at higher level in the 3 different RNA-seq datasets (mCherry<sup>lo</sup> vs mCherry<sup>hi</sup> in Fig. 6, Venus+ vs Venus- in Fig. 4 and cluster R1 in Fig. 2). TA-TEC gene candidates were selected from the Venn diagram. TA-TEC marker gene candidates were selected by omitting cell cycle-related genes (GO:0007049 and Tirosh et al.<sup>3</sup>) from the TA-TEC gene candidates. The list of genes is summarized in Supplementary Table 4.

**D.** Volcano plot for TA-TEC marker candidate expression in mCherry<sup>lo</sup> and mCherry<sup>hi</sup> in RTOC.

3. Tirosh, I. *et al.* Dissecting the multicellular ecosystem of metastatic melanoma by single-cell RNA-seq. *Science* **352**, 189-196 (2016).

Figure\_6-figure supplement 2

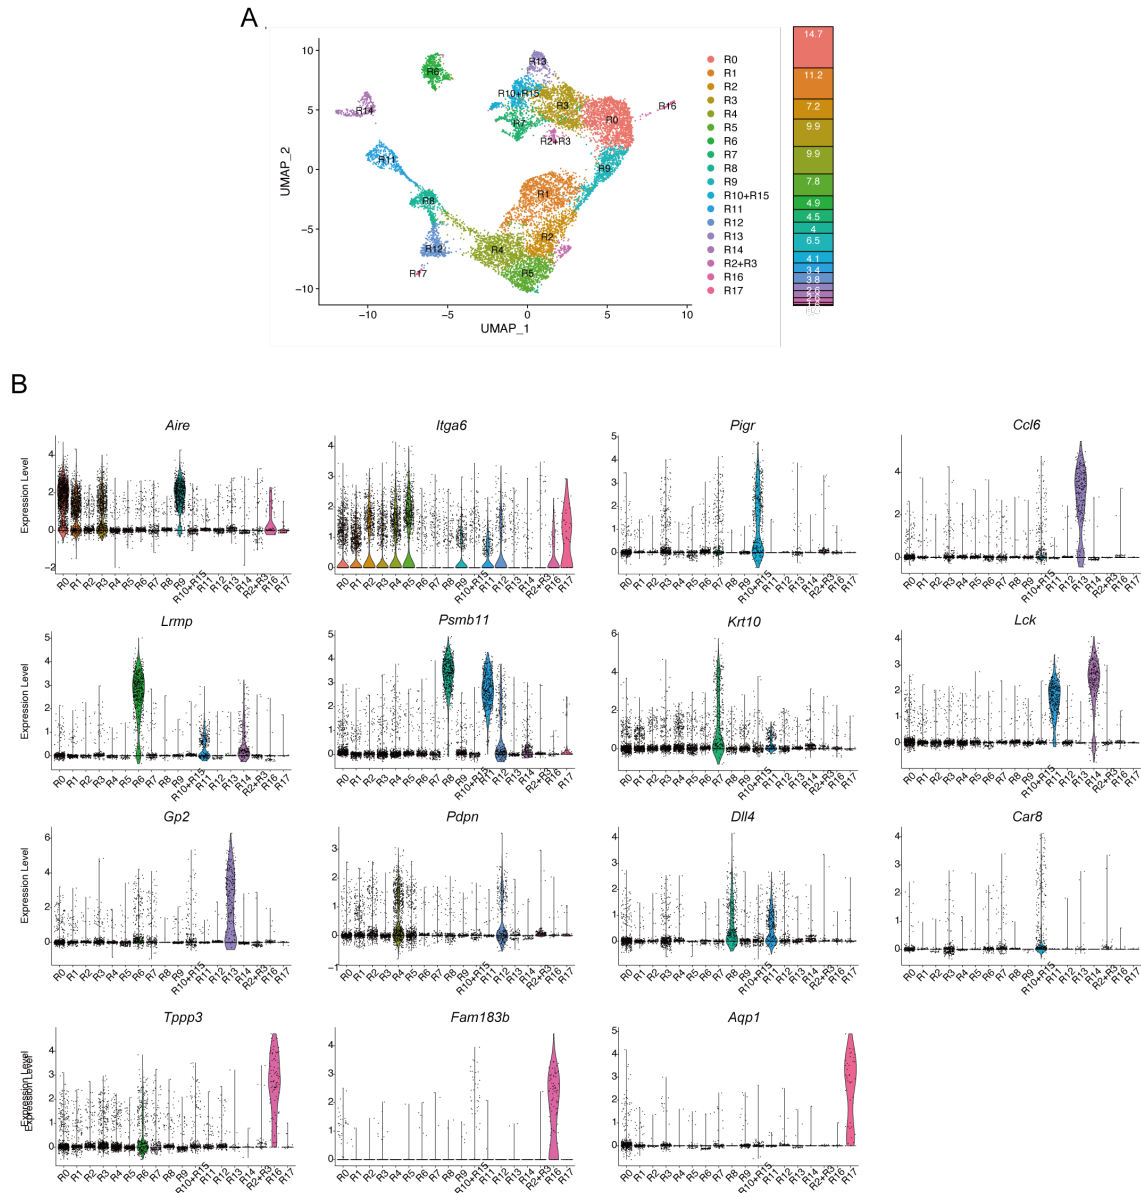

**Figure 6-figure supplement 2**

**A.** UMAP plot of droplet-based scRNA-seq and well-based scRamDA-seq data after their integration. Cell clusters are separated by colors and numbers in the plot. The graph on the right shows the percentages of each cluster in the total number of cells detected. Each cluster was assigned based on gene expression profile and corresponded with clusters in Fig. 2.

**B.** Violin plots depicting expression level of typical TEC marker genes in each cluster.

Figure\_7-figure supplement 1

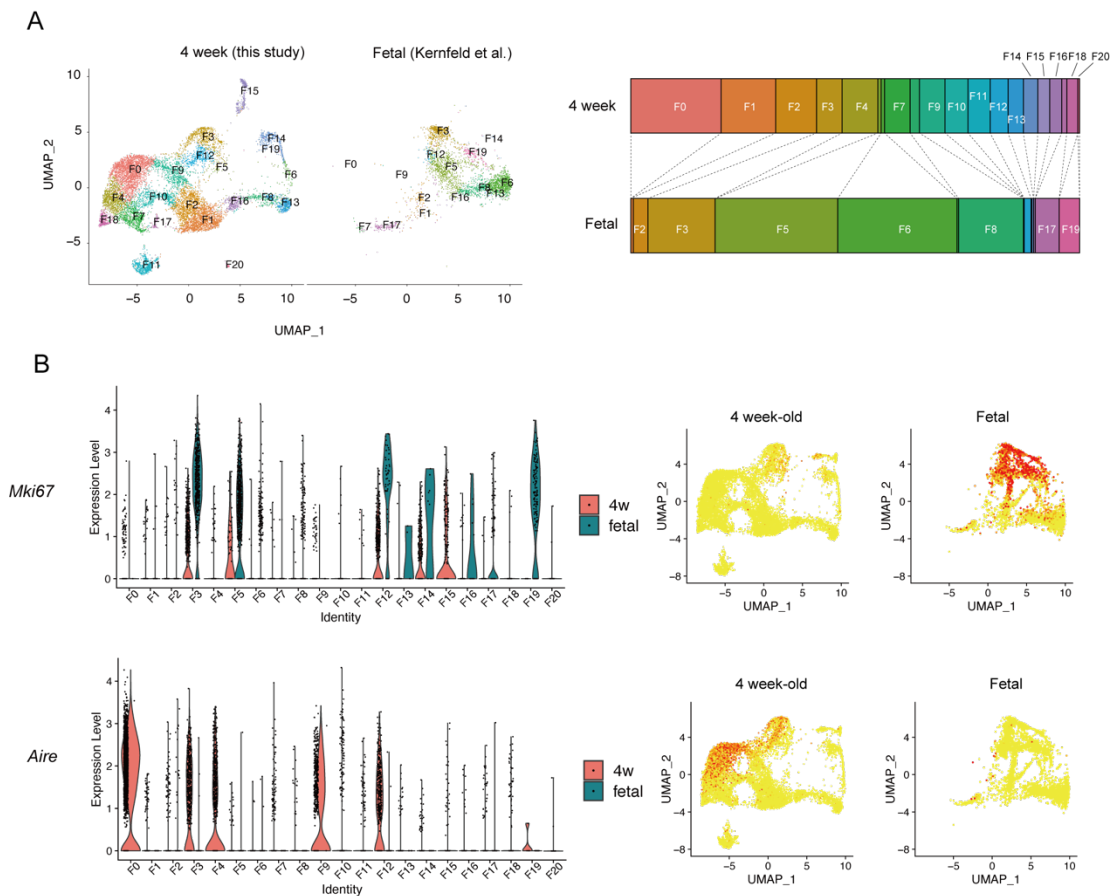

Source: https://www.biorxiv.org/content/biorxiv/early/2021/10/05/2021.10.04.463004.full.pdf
